# Supplementary material for: Leveraging Allele-Specific Expression for Therapeutic Response Gene Discovery in Glioblastoma
Source: Oxford University Press journal article supplement (doi:10.1158/0008-5472.can-21-0810), 2021-12-13
Supplement: can-21-0810_supplementary_table_s2_supps2.xlsx [file can-21-0810_supplementary_table_s2_supps2.xlsx]

## Sheet: 262210_3_supp_7559181_r32kk6
geneID	symbol	recurrence_GBM	testable_GBM	recurrence_wholeblood	testable_wholeblood	pvalue	fdr
ENSG00000000457	SCYL3	1	26	2	222	0.283718	0.88324
ENSG00000000460	C1orf112	0	16	0	255	1	1
ENSG00000000971	CFH	0	10	0	15	1	1
ENSG00000001036	FUCA2	2	25	0	259	0.00746529	0.183344
ENSG00000001461	NIPAL3	0	12	0	178	1	1
ENSG00000001629	ANKIB1	1	29	0	103	0.219697	0.755479
ENSG00000001630	CYP51A1	0	15	2	178	1	1
ENSG00000001631	KRIT1	0	14	0	40	1	1
ENSG00000002016	RAD52	0	19	4	125	1	1
ENSG00000002330	BAD	1	16	0	155	0.0935673	0.536472
ENSG00000002549	LAP3	0	13	1	180	1	1
ENSG00000002822	MAD1L1	0	39	17	292	1	1
ENSG00000002834	LASP1	1	31	0	341	0.0833333	0.536472
ENSG00000002919	SNX11	2	11	0	196	0.00257962	0.113385
ENSG00000003393	ALS2	2	24	1	30	0.415417	1
ENSG00000003402	CFLAR	2	28	5	335	0.0946756	0.536472
ENSG00000003509	NDUFAF7	0	13	0	121	1	1
ENSG00000003756	RBM5	1	23	0	233	0.0898438	0.536472
ENSG00000004139	SARM1	0	11	0	108	1	1
ENSG00000004142	POLDIP2	1	18	0	240	0.0697674	0.536472
ENSG00000004399	PLXND1	3	26	0	247	0.000775218	0.0564535
ENSG00000004478	FKBP4	0	13	0	102	1	1
ENSG00000004487	KDM1A	0	13	0	52	1	1
ENSG00000004534	RBM6	1	25	5	233	0.460903	1
ENSG00000004660	CAMKK1	0	13	11	334	1	1
ENSG00000004766	VPS50	0	19	1	63	1	1
ENSG00000004777	ARHGAP33	1	12	0	105	0.102564	0.544892
ENSG00000004779	NDUFAB1	2	12	0	64	0.0231579	0.328146
ENSG00000004864	SLC25A13	0	15	1	46	1	1
ENSG00000004897	CDC27	0	13	2	214	1	1
ENSG00000004975	DVL2	0	21	0	237	1	1
ENSG00000005059	CCDC109B	0	26	1	273	1	1
ENSG00000005075	POLR2J	0	18	11	219	1	1
ENSG00000005100	DHX33	0	14	0	16	1	1
ENSG00000005156	LIG3	1	21	0	132	0.137255	0.610222
ENSG00000005194	CIAPIN1	0	17	1	69	1	1
ENSG00000005206	SPPL2B	1	24	1	302	0.142029	0.618525
ENSG00000005238	FAM214B	0	21	1	243	1	1
ENSG00000005249	PRKAR2B	0	27	0	178	1	1
ENSG00000005339	CREBBP	2	10	0	191	0.00223881	0.10387
ENSG00000005436	GCFC2	4	26	2	41	0.152173	0.635726
ENSG00000005483	KMT2E	1	20	4	149	0.471577	1
ENSG00000005700	IBTK	1	15	0	55	0.214286	0.746238
ENSG00000005801	ZNF195	1	20	0	39	0.338983	0.981734
ENSG00000005810	MYCBP2	2	17	2	79	0.143023	0.61912
ENSG00000005882	PDK2	0	14	2	221	1	1
ENSG00000005884	ITGA3	2	18	0	30	0.135638	0.608288
ENSG00000006015	C19orf60	0	16	0	226	1	1
ENSG00000006025	OSBPL7	0	17	0	213	1	1
ENSG00000006042	TMEM98	1	18	2	11	0.954844	1
ENSG00000006125	AP2B1	0	20	0	288	1	1
ENSG00000006282	SPATA20	2	26	47	230	0.976934	1
ENSG00000006327	TNFRSF12A	2	14	0	106	0.0127451	0.224228
ENSG00000006453	BAIAP2L1	3	12	2	134	0.00393046	0.140104
ENSG00000006459	KDM7A	0	16	0	290	1	1
ENSG00000006607	FARP2	1	27	1	16	0.86711	1
ENSG00000006625	GGCT	0	26	1	101	1	1
ENSG00000006652	IFRD1	1	23	2	291	0.204646	0.732789
ENSG00000006695	COX10	1	26	1	179	0.238116	0.791838
ENSG00000006715	VPS41	1	28	1	259	0.185912	0.700906
ENSG00000006744	ELAC2	2	18	1	242	0.0130687	0.226469
ENSG00000006831	ADIPOR2	0	15	0	296	1	1
ENSG00000007080	CCDC124	1	18	0	252	0.0666667	0.536472
ENSG00000007202	KIAA0100	2	16	0	104	0.0168067	0.266137
ENSG00000007237	GAS7	1	22	2	334	0.174633	0.677453
ENSG00000007341	ST7L	1	28	1	40	0.657594	1
ENSG00000007392	LUC7L	0	11	2	189	1	1
ENSG00000007541	PIGQ	1	25	0	243	0.0932836	0.536472
ENSG00000007545	CRAMP1	0	23	0	89	1	1
ENSG00000007923	DNAJC11	1	28	0	286	0.089172	0.536472
ENSG00000007944	MYLIP	0	17	0	265	1	1
ENSG00000007968	E2F2	0	19	1	238	1	1
ENSG00000008018	PSMB1	0	20	0	244	1	1
ENSG00000008083	JARID2	1	30	0	223	0.118577	0.57281
ENSG00000008128	CDK11A	0	18	30	221	1	1
ENSG00000008130	NADK	0	25	1	323	1	1
ENSG00000008256	CYTH3	0	22	1	99	1	1
ENSG00000008282	SYPL1	0	18	0	120	1	1
ENSG00000008294	SPAG9	0	21	0	196	1	1
ENSG00000008382	MPND	0	10	1	209	1	1
ENSG00000008405	CRY1	0	15	0	70	1	1
ENSG00000008513	ST3GAL1	0	25	1	333	1	1
ENSG00000008710	PKD1	1	23	1	158	0.238613	0.792574
ENSG00000008838	MED24	1	23	0	257	0.0821429	0.536472
ENSG00000008853	RHOBTB2	0	17	1	90	1	1
ENSG00000008869	HEATR5B	1	24	0	149	0.138728	0.612205
ENSG00000008988	RPS20	0	11	0	161	1	1
ENSG00000009335	UBE3C	0	22	1	188	1	1
ENSG00000009413	REV3L	1	28	1	84	0.439189	1
ENSG00000009830	POMT2	0	26	1	87	1	1
ENSG00000009954	BAZ1B	0	31	1	118	1	1
ENSG00000010017	RANBP9	2	26	0	135	0.0252329	0.346456
ENSG00000010072	SPRTN	0	16	0	50	1	1
ENSG00000010165	METTL13	2	30	0	225	0.0134321	0.230672
ENSG00000010244	ZNF207	3	15	0	233	0.000181167	0.0260563
ENSG00000010278	CD9	0	12	4	86	1	1
ENSG00000010292	NCAPD2	0	31	0	284	1	1
ENSG00000010295	IFFO1	1	18	0	205	0.0807175	0.536472
ENSG00000010322	NISCH	1	22	0	205	0.0969163	0.539873
ENSG00000010539	ZNF200	0	10	3	73	1	1
ENSG00000010626	LRRC23	1	16	2	80	0.424972	1
ENSG00000010704	HFE	0	11	0	35	1	1
ENSG00000010803	SCMH1	0	19	1	146	1	1
ENSG00000010818	HIVEP2	0	27	1	182	1	1
ENSG00000011007	ELOA	1	22	1	244	0.158859	0.644967
ENSG00000011021	CLCN6	0	17	0	160	1	1
ENSG00000011028	MRC2	1	27	1	85	0.425676	1
ENSG00000011105	TSPAN9	0	29	14	113	1	1
ENSG00000011132	APBA3	0	25	1	288	1	1
ENSG00000011243	AKAP8L	1	12	1	82	0.24022	0.795615
ENSG00000011260	UTP18	0	21	1	211	1	1
ENSG00000011275	RNF216	2	13	0	145	0.0062888	0.167607
ENSG00000011295	TTC19	0	11	3	91	1	1
ENSG00000011304	PTBP1	1	19	0	285	0.0625	0.536472
ENSG00000011376	LARS2	0	24	1	34	1	1
ENSG00000011405	PIK3C2A	0	15	2	66	1	1
ENSG00000011422	PLAUR	1	22	1	307	0.129457	0.596769
ENSG00000011426	ANLN	0	33	0	19	1	1
ENSG00000011451	WIZ	2	14	0	161	0.00597701	0.16718
ENSG00000011478	QPCTL	0	15	0	116	1	1
ENSG00000011485	PPP5C	1	17	0	187	0.0833333	0.536472
ENSG00000011523	CEP68	0	25	2	164	1	1
ENSG00000011566	MAP4K3	0	18	0	12	1	1
ENSG00000011638	TMEM159	2	19	1	117	0.051156	0.507414
ENSG00000012048	BRCA1	3	22	0	54	0.0219061	0.315469
ENSG00000012061	ERCC1	1	20	0	209	0.0873362	0.536472
ENSG00000012232	EXTL3	1	20	3	268	0.251334	0.816906
ENSG00000012660	ELOVL5	2	12	6	238	0.0504291	0.5072
ENSG00000012822	CALCOCO1	1	20	0	214	0.0854701	0.536472
ENSG00000012963	UBR7	1	19	1	197	0.168562	0.666932
ENSG00000012983	MAP4K5	0	10	0	38	1	1
ENSG00000013016	EHD3	0	14	0	165	1	1
ENSG00000013288	MAN2B2	0	25	0	295	1	1
ENSG00000013306	SLC25A39	0	25	0	242	1	1
ENSG00000013374	NUB1	0	29	0	281	1	1
ENSG00000013375	PGM3	1	15	0	72	0.172414	0.67476
ENSG00000013503	POLR3B	0	20	0	25	1	1
ENSG00000013523	ANGEL1	1	13	1	79	0.263975	0.842752
ENSG00000013810	TACC3	0	30	6	309	1	1
ENSG00000014123	UFL1	0	15	0	64	1	1
ENSG00000014164	ZC3H3	0	31	28	335	1	1
ENSG00000014216	CAPN1	0	19	0	271	1	1
ENSG00000014824	SLC30A9	1	15	0	116	0.114504	0.564473
ENSG00000014914	MTMR11	0	21	0	40	1	1
ENSG00000015133	CCDC88C	2	23	0	328	0.00411884	0.144486
ENSG00000015153	YAF2	1	15	0	150	0.0909091	0.536472
ENSG00000015475	BID	0	12	3	236	1	1
ENSG00000015532	XYLT2	1	23	1	256	0.158351	0.644531
ENSG00000015676	NUDCD3	1	25	0	155	0.138889	0.612205
ENSG00000016864	GLT8D1	1	17	1	174	0.170515	0.671518
ENSG00000017260	ATP2C1	3	17	0	114	0.00185719	0.0942682
ENSG00000018699	TTC27	1	23	0	62	0.270588	0.854289
ENSG00000020256	ZFP64	0	19	1	36	1	1
ENSG00000020577	SAMD4A	0	16	1	26	1	1
ENSG00000021762	OSBPL5	0	31	12	327	1	1
ENSG00000021776	AQR	1	10	2	54	0.404666	1
ENSG00000022277	RTFDC1	1	21	0	241	0.0801527	0.536472
ENSG00000022567	SLC45A4	2	20	9	329	0.125772	0.588133
ENSG00000022840	RNF10	0	21	1	278	1	1
ENSG00000022976	ZNF839	1	26	0	278	0.0855263	0.536472
ENSG00000023191	RNH1	2	25	1	280	0.0184309	0.280788
ENSG00000023228	NDUFS1	3	29	0	219	0.00145491	0.0804817
ENSG00000023287	RB1CC1	2	26	1	142	0.0628047	0.536472
ENSG00000023330	ALAS1	0	19	1	217	1	1
ENSG00000023516	AKAP11	2	14	1	103	0.0374313	0.437687
ENSG00000024048	UBR2	1	27	1	307	0.155365	0.639855
ENSG00000024422	EHD2	2	23	1	18	0.59334	1
ENSG00000025434	NR1H3	0	22	0	40	1	1
ENSG00000025708	TYMP	0	11	1	285	1	1
ENSG00000025770	NCAPH2	0	15	0	226	1	1
ENSG00000025796	SEC63	0	14	0	138	1	1
ENSG00000026025	VIM	3	11	0	291	3.63e-05	0.00745893
ENSG00000026036	RTEL1-TNFRSF6B	0	31	0	109	1	1
ENSG00000026297	RNASET2	0	16	38	346	1	1
ENSG00000026508	CD44	0	18	5	349	1	1
ENSG00000026652	AGPAT4	0	16	4	210	1	1
ENSG00000026950	BTN3A1	0	18	4	255	1	1
ENSG00000027697	IFNGR1	0	16	0	248	1	1
ENSG00000027847	B4GALT7	0	23	48	284	1	1
ENSG00000028137	TNFRSF1B	0	11	0	358	1	1
ENSG00000028203	VEZT	0	30	1	130	1	1
ENSG00000028310	BRD9	1	11	3	123	0.292983	0.898471
ENSG00000028528	SNX1	0	18	0	223	1	1
ENSG00000029363	BCLAF1	38	41	81	135	2.74e-05	0.00584719
ENSG00000029364	SLC39A9	0	14	0	161	1	1
ENSG00000029534	ANK1	0	12	11	262	1	1
ENSG00000029639	TFB1M	0	27	1	64	1	1
ENSG00000029725	RABEP1	0	20	6	265	1	1
ENSG00000030066	NUP160	1	16	0	60	0.210526	0.742586
ENSG00000030110	BAK1	0	15	6	249	1	1
ENSG00000030419	IKZF2	1	10	1	32	0.423926	1
ENSG00000030582	GRN	1	21	0	210	0.0909091	0.536472
ENSG00000031081	ARHGAP31	0	29	1	51	1	1
ENSG00000032219	ARID4A	2	20	1	173	0.0288314	0.376726
ENSG00000032389	TSSC1	1	27	2	189	0.331417	0.971112
ENSG00000032444	PNPLA6	1	21	0	347	0.0570652	0.534428
ENSG00000033011	ALG1	1	25	0	200	0.111111	0.556329
ENSG00000033050	ABCF2	1	29	0	265	0.0986395	0.544684
ENSG00000033100	CHPF2	0	25	0	269	1	1
ENSG00000033170	FUT8	1	17	0	70	0.195402	0.718766
ENSG00000033178	UBA6	0	20	0	189	1	1
ENSG00000033327	GAB2	0	10	6	221	1	1
ENSG00000033867	SLC4A7	2	29	1	95	0.136152	0.608328
ENSG00000034053	APBA2	0	13	4	190	1	1
ENSG00000034152	MAP2K3	22	28	140	170	0.777296	1
ENSG00000035115	SH3YL1	3	22	4	70	0.214762	0.746992
ENSG00000035681	NSMAF	0	16	0	207	1	1
ENSG00000035862	TIMP2	0	10	1	206	1	1
ENSG00000035928	RFC1	0	16	1	186	1	1
ENSG00000036257	CUL3	1	11	3	99	0.347955	0.997461
ENSG00000037474	NSUN2	1	27	16	284	0.795482	1
ENSG00000037637	FBXO42	0	27	0	251	1	1
ENSG00000037749	MFAP3	0	21	0	103	1	1
ENSG00000037757	MRI1	0	21	10	211	1	1
ENSG00000038210	PI4K2B	1	13	1	58	0.334809	0.976622
ENSG00000038219	BOD1L1	0	32	4	191	1	1
ENSG00000038358	EDC4	1	13	0	134	0.0884354	0.536472
ENSG00000038382	TRIO	0	32	5	181	1	1
ENSG00000038427	VCAN	1	31	0	353	0.0807292	0.536472
ENSG00000038532	CLEC16A	0	20	1	179	1	1
ENSG00000039123	SKIV2L2	1	15	0	59	0.202703	0.731047
ENSG00000039650	PNKP	1	15	2	106	0.330092	0.967901
ENSG00000040199	PHLPP2	1	21	0	30	0.411765	1
ENSG00000040275	SPDL1	0	14	1	32	1	1
ENSG00000040341	STAU2	0	14	1	96	1	1
ENSG00000040487	PQLC2	0	18	1	196	1	1
ENSG00000040531	CTNS	1	18	3	269	0.229329	0.776077
ENSG00000040933	INPP4A	0	19	0	240	1	1
ENSG00000041357	PSMA4	0	23	1	255	1	1
ENSG00000041802	LSG1	1	31	6	308	0.492177	1
ENSG00000041988	THAP3	1	21	0	184	0.102439	0.544892
ENSG00000042445	RETSAT	3	13	21	126	0.395917	1
ENSG00000042493	CAPG	2	27	1	259	0.024321	0.337154
ENSG00000042753	AP2S1	1	12	0	193	0.0585366	0.536472
ENSG00000043093	DCUN1D1	0	10	1	145	1	1
ENSG00000043143	JADE2	0	11	0	209	1	1
ENSG00000043514	TRIT1	1	23	0	104	0.181102	0.689988
ENSG00000044090	CUL7	0	10	0	98	1	1
ENSG00000044115	CTNNA1	1	17	2	226	0.196288	0.719658
ENSG00000044459	CNTLN	1	15	3	17	0.933815	1
ENSG00000047188	YTHDC2	1	29	1	193	0.244711	0.803551
ENSG00000047315	POLR2B	2	21	0	216	0.00750912	0.183344
ENSG00000047346	KIAA1370	1	19	2	106	0.392856	1
ENSG00000047365	ARAP2	0	19	4	216	1	1
ENSG00000047410	TPR	1	14	0	166	0.0777778	0.536472
ENSG00000047578	KIAA0556	0	18	1	224	1	1
ENSG00000047579	DTNBP1	0	13	1	218	1	1
ENSG00000047662	FAM184B	0	13	0	155	1	1
ENSG00000047849	MAP4	1	28	0	246	0.10219	0.544892
ENSG00000048028	USP28	0	13	0	149	1	1
ENSG00000048052	HDAC9	2	14	1	32	0.21581	0.749242
ENSG00000048140	TSPAN17	0	18	0	205	1	1
ENSG00000048162	NOP16	1	13	0	83	0.135417	0.608159
ENSG00000048342	CC2D2A	0	14	5	67	1	1
ENSG00000048392	RRM2B	0	13	2	102	1	1
ENSG00000048471	SNX29	1	25	5	275	0.409433	1
ENSG00000048544	MRPS10	0	18	0	206	1	1
ENSG00000048649	RSF1	2	19	3	145	0.103037	0.544892
ENSG00000048707	VPS13D	0	26	1	129	1	1
ENSG00000048740	CELF2	1	12	24	356	0.575817	1
ENSG00000048828	FAM120A	0	18	0	255	1	1
ENSG00000048991	R3HDM1	0	17	2	53	1	1
ENSG00000049089	COL9A2	0	13	4	191	1	1
ENSG00000049167	ERCC8	0	22	2	22	1	1
ENSG00000049239	H6PD	0	30	3	315	1	1
ENSG00000049246	PER3	0	23	1	10	1	1
ENSG00000049323	LTBP1	4	33	1	50	0.0786424	0.536472
ENSG00000049449	RCN1	0	10	4	93	1	1
ENSG00000049540	ELN	0	14	1	28	1	1
ENSG00000049618	ARID1B	0	17	2	122	1	1
ENSG00000049656	CLPTM1L	0	14	3	183	1	1
ENSG00000049860	HEXB	0	17	6	254	1	1
ENSG00000050130	JKAMP	1	18	1	172	0.180952	0.689988
ENSG00000050165	DKK3	0	15	0	11	1	1
ENSG00000050393	MCUR1	0	11	0	116	1	1
ENSG00000050405	LIMA1	0	17	0	59	1	1
ENSG00000050426	LETMD1	0	27	0	253	1	1
ENSG00000050748	MAPK9	0	13	0	181	1	1
ENSG00000050767	COL23A1	2	10	2	26	0.304813	0.921002
ENSG00000051009	FAM160A2	0	29	6	322	1	1
ENSG00000051108	HERPUD1	1	23	1	241	0.166955	0.662864
ENSG00000051128	HOMER3	0	26	1	271	1	1
ENSG00000051523	CYBA	4	10	1	354	1.44e-06	0.000753094
ENSG00000051825	MPHOSPH9	1	26	2	101	0.500112	1
ENSG00000052749	RRP12	2	12	6	271	0.0401052	0.455263
ENSG00000052841	TTC17	2	12	0	157	0.0046492	0.150263
ENSG00000053372	MRTO4	1	29	0	223	0.115079	0.564763
ENSG00000053770	AP5M1	1	11	0	66	0.142857	0.61912
ENSG00000053900	ANAPC4	0	14	0	224	1	1
ENSG00000054116	TRAPPC3	0	17	0	117	1	1
ENSG00000054118	THRAP3	1	22	1	252	0.154408	0.639278
ENSG00000054148	PHPT1	0	16	1	128	1	1
ENSG00000054219	LY75	2	13	0	189	0.00384218	0.140104
ENSG00000054267	ARID4B	3	26	2	166	0.0184935	0.280788
ENSG00000054282	SDCCAG8	0	27	2	189	1	1
ENSG00000054523	KIF1B	0	22	0	249	1	1
ENSG00000054654	SYNE2	2	27	1	289	0.0200343	0.297055
ENSG00000054793	ATP9A	1	31	6	193	0.652875	1
ENSG00000054965	FAM168A	1	22	1	237	0.16297	0.654726
ENSG00000054967	RELT	0	14	0	279	1	1
ENSG00000054983	GALC	2	20	1	270	0.0130354	0.226469
ENSG00000055044	NOP58	1	15	0	128	0.104895	0.547379
ENSG00000055118	KCNH2	3	26	0	123	0.00481237	0.153809
ENSG00000055147	FAM114A2	2	21	0	166	0.0120752	0.220619
ENSG00000055163	CYFIP2	0	11	1	332	1	1
ENSG00000055208	TAB2	1	10	0	227	0.0421941	0.467712
ENSG00000055483	USP36	0	31	0	256	1	1
ENSG00000055609	KMT2C	1	21	2	106	0.421312	1
ENSG00000056050	C4orf27	0	10	2	70	1	1
ENSG00000056097	ZFR	1	20	0	132	0.131579	0.60125
ENSG00000056736	IL17RB	0	15	0	16	1	1
ENSG00000056972	TRAF3IP2	1	17	0	84	0.168317	0.666433
ENSG00000057252	SOAT1	1	33	1	278	0.201265	0.729144
ENSG00000057704	TMCC3	0	17	2	328	1	1
ENSG00000058063	ATP11B	0	24	1	233	1	1
ENSG00000058091	CDK14	1	12	3	127	0.306011	0.921571
ENSG00000058262	SEC61A1	1	12	0	220	0.0517241	0.508665
ENSG00000058272	PPP1R12A	0	10	0	101	1	1
ENSG00000058453	CROCC	1	21	6	172	0.559559	1
ENSG00000058668	ATP2B4	0	29	0	269	1	1
ENSG00000058673	ZC3H11A	2	29	0	236	0.0116066	0.216812
ENSG00000058729	RIOK2	0	24	3	131	1	1
ENSG00000058799	YIPF1	0	16	0	267	1	1
ENSG00000058866	DGKG	0	17	1	45	1	1
ENSG00000059122	FLYWCH1	0	23	60	316	1	1
ENSG00000059145	UNKL	0	16	0	252	1	1
ENSG00000059378	PARP12	1	21	0	242	0.0798479	0.536472
ENSG00000059588	TARBP1	1	31	1	184	0.268159	0.849515
ENSG00000059691	GATB	0	14	0	86	1	1
ENSG00000059728	MXD1	0	14	1	290	1	1
ENSG00000059758	CDK17	0	17	1	180	1	1
ENSG00000059769	DNAJC25	0	14	1	19	1	1
ENSG00000060069	CTDP1	0	18	14	309	1	1
ENSG00000060138	YBX3	1	11	0	210	0.0497738	0.504649
ENSG00000060237	WNK1	0	35	1	310	1	1
ENSG00000060491	OGFR	0	24	1	312	1	1
ENSG00000060688	SNRNP40	0	22	0	137	1	1
ENSG00000060762	MPC1	1	13	0	214	0.0572687	0.534428
ENSG00000060971	ACAA1	1	23	0	195	0.105505	0.5483
ENSG00000061273	HDAC7	0	35	0	343	1	1
ENSG00000061794	MRPS35	1	12	0	108	0.1	0.544892
ENSG00000061936	SFSWAP	0	29	0	249	1	1
ENSG00000061938	TNK2	0	30	0	350	1	1
ENSG00000061987	MON2	1	29	2	225	0.305966	0.921571
ENSG00000062194	GPBP1	2	15	1	243	0.00917974	0.200802
ENSG00000062650	WAPL	3	14	0	130	0.000746906	0.0558045
ENSG00000062822	POLD1	1	12	0	124	0.0882353	0.536472
ENSG00000063177	RPL18	0	10	0	43	1	1
ENSG00000063241	ISOC2	1	13	0	168	0.0718232	0.536472
ENSG00000063244	U2AF2	0	11	2	179	1	1
ENSG00000063322	MED29	0	14	0	212	1	1
ENSG00000063438	AHRR	2	23	1	133	0.057072	0.534428
ENSG00000063660	GPC1	2	31	0	12	0.51495	1
ENSG00000063761	ADCK1	0	10	3	175	1	1
ENSG00000063854	HAGH	0	20	5	229	1	1
ENSG00000064012	CASP8	0	26	13	289	1	1
ENSG00000064102	INTS13	0	19	0	135	1	1
ENSG00000064115	TM7SF3	2	11	1	86	0.0331999	0.412652
ENSG00000064225	ST3GAL6	0	11	1	123	1	1
ENSG00000064300	NGFR	1	11	0	21	0.34375	0.990282
ENSG00000064313	TAF2	2	27	0	90	0.0517241	0.508665
ENSG00000064393	HIPK2	2	28	1	201	0.0401214	0.455263
ENSG00000064419	TNPO3	1	27	2	244	0.271002	0.854289
ENSG00000064545	TMEM161A	0	13	0	113	1	1
ENSG00000064601	CTSA	1	17	2	202	0.216179	0.749332
ENSG00000064607	SUGP2	2	21	0	181	0.0103443	0.209528
ENSG00000064651	SLC12A2	0	11	1	14	1	1
ENSG00000064666	CNN2	0	19	5	346	1	1
ENSG00000064703	DDX20	0	27	2	135	1	1
ENSG00000064763	FAR2	0	15	2	262	1	1
ENSG00000064932	SBNO2	1	27	4	326	0.329828	0.967901
ENSG00000064961	HMG20B	0	12	0	211	1	1
ENSG00000064995	TAF11	0	14	0	148	1	1
ENSG00000064999	ANKS1A	0	32	0	269	1	1
ENSG00000065000	AP3D1	1	25	1	251	0.173254	0.67533
ENSG00000065029	ZNF76	0	13	0	176	1	1
ENSG00000065054	SLC9A3R2	1	19	0	58	0.246753	0.807952
ENSG00000065060	UHRF1BP1	0	26	0	22	1	1
ENSG00000065135	GNAI3	2	26	0	268	0.00754568	0.183344
ENSG00000065183	WDR3	0	10	1	27	1	1
ENSG00000065243	PKN2	2	23	1	172	0.0372161	0.436058
ENSG00000065268	WDR18	1	26	3	254	0.324319	0.953976
ENSG00000065308	TRAM2	0	20	2	190	1	1
ENSG00000065413	ANKRD44	4	22	13	254	0.0362046	0.431233
ENSG00000065427	KARS	2	18	0	102	0.0214286	0.312098
ENSG00000065457	ADAT1	1	22	1	141	0.252443	0.819533
ENSG00000065485	PDIA5	0	19	0	133	1	1
ENSG00000065491	TBC1D22B	0	17	0	234	1	1
ENSG00000065526	SPEN	1	22	0	236	0.0852713	0.536472
ENSG00000065534	MYLK	3	22	5	46	0.512689	1
ENSG00000065548	ZC3H15	1	14	1	36	0.485714	1
ENSG00000065600	TMEM206	0	11	0	40	1	1
ENSG00000065613	SLK	3	12	1	163	0.000962972	0.0659521
ENSG00000065717	TLE2	0	15	0	48	1	1
ENSG00000065802	ASB1	1	17	3	200	0.280139	0.876367
ENSG00000065882	TBC1D1	0	28	1	345	1	1
ENSG00000065883	CDK13	0	19	0	130	1	1
ENSG00000065970	FOXJ2	0	13	0	248	1	1
ENSG00000066027	PPP2R5A	0	20	3	273	1	1
ENSG00000066044	ELAVL1	0	13	0	248	1	1
ENSG00000066084	DIP2B	0	21	15	254	1	1
ENSG00000066135	KDM4A	0	14	0	111	1	1
ENSG00000066136	NFYC	0	21	1	258	1	1
ENSG00000066230	SLC9A3	1	30	10	62	0.990544	1
ENSG00000066379	ZNRD1	0	22	0	167	1	1
ENSG00000066427	ATXN3	0	13	0	171	1	1
ENSG00000066455	GOLGA5	2	15	3	152	0.0644587	0.536472
ENSG00000066583	ISOC1	0	14	1	53	1	1
ENSG00000066654	THUMPD1	1	18	0	203	0.081448	0.536472
ENSG00000066697	MSANTD3	0	11	0	22	1	1
ENSG00000066739	ATG2B	1	26	0	185	0.123223	0.584901
ENSG00000066827	ZFAT	2	30	4	204	0.171852	0.673938
ENSG00000066923	STAG3	0	24	3	235	1	1
ENSG00000066926	FECH	0	19	2	251	1	1
ENSG00000066933	MYO9A	2	22	2	63	0.274339	0.861974
ENSG00000067057	PFKP	3	14	3	344	0.000894593	0.0639278
ENSG00000067066	SP100	1	17	26	336	0.749848	1
ENSG00000067141	NEO1	1	16	0	83	0.161616	0.651105
ENSG00000067182	TNFRSF1A	0	16	1	304	1	1
ENSG00000067191	CACNB1	1	12	0	84	0.125	0.588133
ENSG00000067208	EVI5	0	26	1	64	1	1
ENSG00000067221	STOML1	0	17	1	79	1	1
ENSG00000067225	PKM	2	12	0	227	0.00232059	0.106803
ENSG00000067334	DNTTIP2	2	29	1	248	0.0297775	0.385834
ENSG00000067365	METTL22	0	25	4	254	1	1
ENSG00000067369	TP53BP1	1	22	0	107	0.170543	0.671518
ENSG00000067596	DHX8	2	16	0	156	0.00815994	0.191609
ENSG00000067704	IARS2	1	12	0	117	0.0930233	0.536472
ENSG00000067836	ROGDI	0	22	0	254	1	1
ENSG00000068001	HYAL2	0	14	0	97	1	1
ENSG00000068024	HDAC4	0	27	5	341	1	1
ENSG00000068097	HEATR6	1	10	0	40	0.2	0.726848
ENSG00000068120	COASY	0	13	0	215	1	1
ENSG00000068305	MEF2A	1	32	3	299	0.335456	0.977153
ENSG00000068650	ATP11A	0	17	3	331	1	1
ENSG00000068654	POLR1A	0	26	0	68	1	1
ENSG00000068697	LAPTM4A	0	12	1	202	1	1
ENSG00000068724	TTC7A	1	18	4	296	0.257048	0.827836
ENSG00000068745	IP6K2	3	31	0	260	0.00110584	0.0699109
ENSG00000068784	SRBD1	1	12	1	126	0.166931	0.662864
ENSG00000068878	PSME4	1	28	1	244	0.195626	0.719129
ENSG00000068912	ERLEC1	0	14	1	104	1	1
ENSG00000069248	NUP133	2	17	1	78	0.0815519	0.536472
ENSG00000069424	KCNAB2	0	15	2	345	1	1
ENSG00000069667	RORA	2	11	2	141	0.0265015	0.357895
ENSG00000069702	TGFBR3	0	20	1	113	1	1
ENSG00000069869	NEDD4	1	19	1	77	0.358333	1
ENSG00000069956	MAPK6	2	12	0	52	0.0327381	0.412652
ENSG00000069998	CECR5	1	16	0	208	0.0714286	0.536472
ENSG00000070010	UFD1L	0	10	0	279	1	1
ENSG00000070047	PHRF1	0	19	0	253	1	1
ENSG00000070061	IKBKAP	2	30	2	208	0.0785345	0.536472
ENSG00000070081	NUCB2	0	11	2	163	1	1
ENSG00000070214	SLC44A1	0	15	0	84	1	1
ENSG00000070269	TMEM260	0	18	1	174	1	1
ENSG00000070366	SMG6	1	28	2	260	0.265059	0.84341
ENSG00000070371	CLTCL1	0	20	7	224	1	1
ENSG00000070413	DGCR2	1	16	0	263	0.0573477	0.534428
ENSG00000070423	RNF126	2	24	0	303	0.00517814	0.158457
ENSG00000070444	MNT	1	10	0	254	0.0378788	0.438985
ENSG00000070476	ZXDC	1	30	0	288	0.0943396	0.536472
ENSG00000070540	WIPI1	1	23	3	333	0.235341	0.78579
ENSG00000070610	GBA2	0	19	0	191	1	1
ENSG00000070614	NDST1	2	26	12	274	0.346656	0.995165
ENSG00000070669	ASNS	0	21	0	142	1	1
ENSG00000070785	EIF2B3	1	23	1	113	0.310675	0.930261
ENSG00000070814	TCOF1	0	24	0	220	1	1
ENSG00000070882	OSBPL3	0	27	0	124	1	1
ENSG00000070950	RAD18	0	16	0	29	1	1
ENSG00000070961	ATP2B1	1	17	1	87	0.301531	0.915101
ENSG00000071054	MAP4K4	2	33	1	244	0.0383237	0.442723
ENSG00000071073	MGAT4A	1	14	1	161	0.154023	0.638857
ENSG00000071082	RPL31	1	16	3	179	0.29195	0.897478
ENSG00000071127	WDR1	0	27	5	326	1	1
ENSG00000071189	SNX13	2	27	1	123	0.0836169	0.536472
ENSG00000071242	RPS6KA2	1	29	9	90	0.946232	1
ENSG00000071243	ING3	0	10	1	64	1	1
ENSG00000071246	VASH1	2	18	4	122	0.171442	0.672889
ENSG00000071462	WBSCR22	0	22	0	153	1	1
ENSG00000071564	TCF3	1	13	0	305	0.0408805	0.458147
ENSG00000071575	TRIB2	0	21	2	189	1	1
ENSG00000071794	HLTF	0	26	2	92	1	1
ENSG00000071894	CPSF1	2	20	13	219	0.363157	1
ENSG00000071967	CYBRD1	1	19	28	255	0.889542	1
ENSG00000071994	PDCD2	0	20	0	194	1	1
ENSG00000072071	ADGRL1	1	12	2	94	0.305183	0.921571
ENSG00000072110	ACTN1	4	27	3	283	0.00135129	0.0785251
ENSG00000072121	ZFYVE26	0	24	0	225	1	1
ENSG00000072134	EPN2	0	13	0	48	1	1
ENSG00000072210	ALDH3A2	0	17	9	159	1	1
ENSG00000072274	TFRC	0	24	0	270	1	1
ENSG00000072310	SREBF1	1	18	0	115	0.135338	0.608159
ENSG00000072364	AFF4	1	16	1	122	0.21919	0.755089
ENSG00000072571	HMMR	2	26	0	18	0.343552	0.990241
ENSG00000072609	CHFR	0	27	0	282	1	1
ENSG00000072736	NFATC3	1	11	0	169	0.0611111	0.536472
ENSG00000072786	STK10	0	33	0	352	1	1
ENSG00000072864	NDE1	0	22	0	281	1	1
ENSG00000072958	AP1M1	0	13	0	215	1	1
ENSG00000073008	PVR	0	12	1	109	1	1
ENSG00000073050	XRCC1	1	25	0	270	0.0847458	0.536472
ENSG00000073060	SCARB1	0	30	1	117	1	1
ENSG00000073111	MCM2	1	22	0	63	0.258824	0.832114
ENSG00000073331	ALPK1	1	10	1	344	0.055777	0.529913
ENSG00000073536	NLE1	0	16	0	41	1	1
ENSG00000073578	SDHA	0	19	1	269	1	1
ENSG00000073614	KDM5A	1	19	1	187	0.176368	0.681241
ENSG00000073910	FRY	0	17	2	156	1	1
ENSG00000073921	PICALM	0	25	4	315	1	1
ENSG00000073969	NSF	0	18	0	155	1	1
ENSG00000074054	CLASP1	0	17	0	230	1	1
ENSG00000074071	MRPS34	0	13	0	161	1	1
ENSG00000074181	NOTCH3	0	20	0	13	1	1
ENSG00000074266	EED	1	17	0	92	0.155963	0.640325
ENSG00000074416	MGLL	0	16	2	213	1	1
ENSG00000074603	DPP8	0	15	1	181	1	1
ENSG00000074695	LMAN1	1	25	1	183	0.226449	0.77041
ENSG00000074696	HACD3	0	12	1	72	1	1
ENSG00000074755	ZZEF1	2	26	0	283	0.00682974	0.17309
ENSG00000074800	ENO1	0	13	1	216	1	1
ENSG00000074855	ANO8	0	27	0	173	1	1
ENSG00000074964	ARHGEF10L	0	26	0	125	1	1
ENSG00000075151	EIF4G3	1	10	2	94	0.263915	0.842752
ENSG00000075218	GTSE1	0	11	0	10	1	1
ENSG00000075234	TTC38	0	10	8	185	1	1
ENSG00000075239	ACAT1	0	15	1	169	1	1
ENSG00000075292	ZNF638	2	25	1	237	0.0247704	0.34144
ENSG00000075336	TIMM21	3	14	0	15	0.0996169	0.544892
ENSG00000075340	ADD2	0	17	3	43	1	1
ENSG00000075399	VPS9D1	0	18	0	311	1	1
ENSG00000075413	MARK3	0	12	3	232	1	1
ENSG00000075420	FNDC3B	0	28	5	283	1	1
ENSG00000075539	FRYL	1	23	1	50	0.533866	1
ENSG00000075568	TMEM131	1	29	5	266	0.465536	1
ENSG00000075618	FSCN1	2	17	0	48	0.0653846	0.536472
ENSG00000075624	ACTB	1	30	0	238	0.11194	0.558307
ENSG00000075651	PLD1	1	17	1	57	0.409108	1
ENSG00000075702	WDR62	0	16	0	50	1	1
ENSG00000075711	DLG1	0	17	0	146	1	1
ENSG00000075790	BCAP29	1	16	0	89	0.152381	0.635726
ENSG00000075856	SART3	0	19	0	160	1	1
ENSG00000075914	EXOSC7	0	21	0	182	1	1
ENSG00000075945	KIFAP3	1	14	2	74	0.409273	1
ENSG00000075975	MKRN2	0	15	0	246	1	1
ENSG00000076003	MCM6	0	11	0	62	1	1
ENSG00000076043	REXO2	0	12	1	41	1	1
ENSG00000076108	BAZ2A	1	21	39	230	0.977945	1
ENSG00000076201	PTPN23	0	15	0	208	1	1
ENSG00000076242	MLH1	0	18	0	141	1	1
ENSG00000076351	SLC46A1	0	16	0	13	1	1
ENSG00000076356	PLXNA2	0	35	2	31	1	1
ENSG00000076513	ANKRD13A	1	14	0	171	0.0756757	0.536472
ENSG00000076555	ACACB	0	21	1	74	1	1
ENSG00000076604	TRAF4	1	16	0	68	0.190476	0.70743
ENSG00000076641	PAG1	1	22	2	305	0.1891	0.706757
ENSG00000076650	GPATCH1	0	22	2	144	1	1
ENSG00000076685	NT5C2	2	11	0	279	0.00131249	0.077843
ENSG00000076706	MCAM	0	26	1	45	1	1
ENSG00000076864	RAP1GAP	0	21	28	130	1	1
ENSG00000076924	XAB2	1	24	1	264	0.159988	0.646812
ENSG00000077044	DGKD	0	14	2	323	1	1
ENSG00000077097	TOP2B	0	15	0	99	1	1
ENSG00000077152	UBE2T	0	23	0	26	1	1
ENSG00000077232	DNAJC10	1	26	1	164	0.255583	0.825124
ENSG00000077235	GTF3C1	2	19	0	166	0.010047	0.208666
ENSG00000077238	IL4R	1	10	4	333	0.138279	0.610996
ENSG00000077254	USP33	1	25	2	151	0.37027	1
ENSG00000077312	SNRPA	0	13	0	195	1	1
ENSG00000077348	EXOSC5	1	13	3	116	0.349623	1
ENSG00000077454	LRCH4	0	27	0	301	1	1
ENSG00000077458	FAM76B	1	20	0	118	0.144928	0.62268
ENSG00000077463	SIRT6	1	12	0	146	0.0759494	0.536472
ENSG00000077514	POLD3	0	20	1	189	1	1
ENSG00000077782	FGFR1	1	18	0	24	0.428571	1
ENSG00000077942	FBLN1	0	12	1	14	1	1
ENSG00000078043	PIAS2	4	10	0	67	0.000155179	0.0228909
ENSG00000078053	AMPH	1	15	1	149	0.175071	0.678695
ENSG00000078070	MCCC1	0	17	0	73	1	1
ENSG00000078124	ACER3	1	12	1	208	0.106351	0.548406
ENSG00000078142	PIK3C3	0	12	2	92	1	1
ENSG00000078177	N4BP2	0	16	0	35	1	1
ENSG00000078237	TIGAR	0	27	0	191	1	1
ENSG00000078246	TULP3	0	21	1	65	1	1
ENSG00000078269	SYNJ2	2	27	6	118	0.458776	1
ENSG00000078304	PPP2R5C	1	14	3	228	0.213298	0.745507
ENSG00000078319	PMS2L1	0	10	0	82	1	1
ENSG00000078487	ZCWPW1	0	10	2	76	1	1
ENSG00000078618	NRDC	0	26	0	306	1	1
ENSG00000078674	PCM1	3	27	2	217	0.0104741	0.209528
ENSG00000078699	CBFA2T2	0	18	0	130	1	1
ENSG00000078808	SDF4	0	19	0	287	1	1
ENSG00000078902	TOLLIP	0	18	0	318	1	1
ENSG00000079134	THOC1	1	15	2	40	0.623404	1
ENSG00000079215	SLC1A3	2	26	1	133	0.0697108	0.536472
ENSG00000079246	XRCC5	0	21	1	297	1	1
ENSG00000079308	TNS1	1	24	3	346	0.236154	0.786679
ENSG00000079313	REXO1	0	25	1	259	1	1
ENSG00000079335	CDC14A	0	12	1	49	1	1
ENSG00000079387	SENP1	1	16	1	142	0.192857	0.714426
ENSG00000079432	CIC	2	22	0	214	0.00833033	0.193219
ENSG00000079459	FDFT1	0	36	1	331	1	1
ENSG00000079739	PGM1	0	31	1	304	1	1
ENSG00000079785	DDX1	0	22	0	155	1	1
ENSG00000079805	DNM2	1	18	1	316	0.105033	0.547379
ENSG00000079819	EPB41L2	1	11	1	89	0.208889	0.740442
ENSG00000079999	KEAP1	0	14	0	215	1	1
ENSG00000080189	SLC35C2	0	14	1	219	1	1
ENSG00000080200	CRYBG3	3	35	0	17	0.296154	0.904533
ENSG00000080345	RIF1	1	33	3	144	0.565357	1
ENSG00000080371	RAB21	0	10	0	196	1	1
ENSG00000080503	SMARCA2	0	25	1	288	1	1
ENSG00000080546	SESN1	0	13	0	61	1	1
ENSG00000080573	COL5A3	0	14	12	36	1	1
ENSG00000080608	PUM3	1	21	1	171	0.207297	0.736227
ENSG00000080802	CNOT4	2	25	1	44	0.295835	0.904533
ENSG00000080819	CPOX	2	32	1	231	0.0398797	0.455215
ENSG00000080824	HSP90AA1	1	18	0	176	0.0927835	0.536472
ENSG00000080845	DLGAP4	0	11	5	170	1	1
ENSG00000080947	CROCCP3	1	24	1	68	0.455805	1
ENSG00000080986	NDC80	0	13	0	30	1	1
ENSG00000081014	AP4E1	0	13	0	43	1	1
ENSG00000081177	EXD2	2	21	0	13	0.374332	1
ENSG00000081307	UBA5	1	16	0	27	0.372093	1
ENSG00000081320	STK17B	0	19	0	291	1	1
ENSG00000081665	ZNF506	0	15	0	192	1	1
ENSG00000081692	JMJD4	0	28	1	205	1	1
ENSG00000081721	DUSP12	0	22	0	142	1	1
ENSG00000081760	AACS	0	22	0	149	1	1
ENSG00000081791	KIAA0141	0	19	0	249	1	1
ENSG00000081913	PHLPP1	0	27	0	77	1	1
ENSG00000082014	SMARCD3	0	17	0	127	1	1
ENSG00000082146	STRADB	0	11	0	216	1	1
ENSG00000082213	C5orf22	1	17	1	213	0.142662	0.61912
ENSG00000082258	CCNT2	0	27	1	129	1	1
ENSG00000082515	MRPL22	0	11	0	139	1	1
ENSG00000082516	GEMIN5	0	12	0	32	1	1
ENSG00000082641	NFE2L1	0	14	0	184	1	1
ENSG00000082781	ITGB5	2	17	0	145	0.0104286	0.209528
ENSG00000082805	ERC1	0	15	8	110	1	1
ENSG00000082996	RNF13	1	22	3	203	0.339329	0.981734
ENSG00000083097	DOPEY1	1	17	1	24	0.663415	1
ENSG00000083168	KAT6A	1	24	2	245	0.245318	0.80456
ENSG00000083223	ZCCHC6	2	17	0	272	0.00326797	0.131123
ENSG00000083290	ULK2	2	12	0	14	0.203077	0.731047
ENSG00000083312	TNPO1	2	16	1	182	0.0175797	0.272604
ENSG00000083444	PLOD1	0	23	3	245	1	1
ENSG00000083520	DIS3	0	14	0	159	1	1
ENSG00000083807	SLC27A5	1	16	0	13	0.551724	1
ENSG00000083812	ZNF324	0	12	0	36	1	1
ENSG00000083814	ZNF671	0	16	0	204	1	1
ENSG00000083828	ZNF586	1	15	0	267	0.0531915	0.518662
ENSG00000083838	ZNF446	0	20	1	174	1	1
ENSG00000083844	ZNF264	2	19	3	82	0.235975	0.786537
ENSG00000083845	RPS5	0	21	0	206	1	1
ENSG00000084070	SMAP2	0	10	1	300	1	1
ENSG00000084072	PPIE	1	12	74	192	0.996645	1
ENSG00000084090	STARD7	2	24	0	191	0.0119974	0.220619
ENSG00000084092	NOA1	1	13	0	61	0.175676	0.680123
ENSG00000084093	REST	0	23	0	155	1	1
ENSG00000084112	SSH1	0	22	1	213	1	1
ENSG00000084207	GSTP1	0	24	0	213	1	1
ENSG00000084234	APLP2	0	13	0	185	1	1
ENSG00000084444	FAM234B	0	14	1	18	1	1
ENSG00000084652	TXLNA	0	12	0	84	1	1
ENSG00000084676	NCOA1	1	18	2	226	0.20617	0.734425
ENSG00000084693	AGBL5	2	28	1	57	0.251311	0.816906
ENSG00000084731	KIF3C	0	21	1	157	1	1
ENSG00000084754	HADHA	0	18	0	152	1	1
ENSG00000084764	MAPRE3	0	18	0	166	1	1
ENSG00000084774	CAD	0	23	0	142	1	1
ENSG00000085117	CD82	1	22	0	343	0.060274	0.536472
ENSG00000085274	MYNN	0	13	0	53	1	1
ENSG00000085377	PREP	0	23	0	216	1	1
ENSG00000085415	SEH1L	0	24	1	113	1	1
ENSG00000085449	WDFY1	0	27	0	194	1	1
ENSG00000085491	SLC25A24	1	13	0	147	0.08125	0.536472
ENSG00000085511	MAP3K4	0	10	1	115	1	1
ENSG00000085662	AKR1B1	0	14	2	152	1	1
ENSG00000085719	CPNE3	1	33	0	298	0.0996979	0.544892
ENSG00000085733	CTTN	0	31	0	113	1	1
ENSG00000085760	MTIF2	0	21	1	126	1	1
ENSG00000085788	DDHD2	0	17	0	19	1	1
ENSG00000085832	EPS15	0	24	0	271	1	1
ENSG00000085872	CHERP	0	11	0	91	1	1
ENSG00000085978	ATG16L1	1	23	0	259	0.0815603	0.536472
ENSG00000085982	USP40	0	26	1	110	1	1
ENSG00000085998	POMGNT1	0	17	0	111	1	1
ENSG00000086015	MAST2	0	33	2	252	1	1
ENSG00000086061	DNAJA1	0	19	0	245	1	1
ENSG00000086062	B4GALT1	1	16	1	266	0.110446	0.556329
ENSG00000086102	NFX1	0	17	2	70	1	1
ENSG00000086189	DIMT1	2	17	0	158	0.00893268	0.19996
ENSG00000086232	EIF2AK1	0	32	1	287	1	1
ENSG00000086289	EPDR1	1	21	8	126	0.760682	1
ENSG00000086504	MRPL28	1	26	0	254	0.0928571	0.536472
ENSG00000086848	ALG9	1	19	0	47	0.287879	0.891417
ENSG00000087008	ACOX3	0	25	0	170	1	1
ENSG00000087053	MTMR2	1	19	1	59	0.430236	1
ENSG00000087074	PPP1R15A	3	21	0	256	0.000379561	0.0370104
ENSG00000087077	TRIP6	1	29	0	226	0.113725	0.561117
ENSG00000087086	FTL	0	11	0	185	1	1
ENSG00000087087	SRRT	0	30	1	275	1	1
ENSG00000087157	PGS1	0	15	3	347	1	1
ENSG00000087191	PSMC5	0	31	0	232	1	1
ENSG00000087206	UIMC1	0	18	0	269	1	1
ENSG00000087245	MMP2	0	29	1	40	1	1
ENSG00000087253	LPCAT2	0	15	2	300	1	1
ENSG00000087258	GNAO1	0	12	0	15	1	1
ENSG00000087263	OGFOD1	0	16	1	215	1	1
ENSG00000087266	SH3BP2	0	24	0	347	1	1
ENSG00000087269	NOP14	0	18	0	223	1	1
ENSG00000087274	ADD1	0	13	0	262	1	1
ENSG00000087301	TXNDC16	0	16	1	41	1	1
ENSG00000087302	C14orf166	1	14	0	33	0.297872	0.908621
ENSG00000087365	SF3B2	1	20	2	196	0.253918	0.821317
ENSG00000087448	KLHL42	3	18	1	45	0.0667825	0.536472
ENSG00000087460	GNAS	4	27	3	333	0.000761138	0.0561388
ENSG00000087470	DNM1L	0	19	1	156	1	1
ENSG00000087586	AURKA	0	23	0	53	1	1
ENSG00000087884	AAMDC	0	14	0	122	1	1
ENSG00000087903	RFX2	0	13	0	218	1	1
ENSG00000088035	ALG6	1	14	0	153	0.0838323	0.536472
ENSG00000088205	DDX18	1	27	1	249	0.186403	0.702277
ENSG00000088256	GNA11	0	17	0	56	1	1
ENSG00000088298	EDEM2	0	13	4	239	1	1
ENSG00000088325	TPX2	0	26	0	72	1	1
ENSG00000088387	DOCK9	1	18	1	46	0.486607	1
ENSG00000088448	ANKRD10	1	11	0	212	0.0493274	0.504649
ENSG00000088543	C3orf18	0	12	1	34	1	1
ENSG00000088682	COQ9	0	14	0	85	1	1
ENSG00000088812	ATRN	1	31	3	82	0.728354	1
ENSG00000088826	SMOX	1	26	2	235	0.271003	0.854289
ENSG00000088832	FKBP1A	1	32	0	330	0.0883978	0.536472
ENSG00000088833	NSFL1C	0	23	21	298	1	1
ENSG00000088854	C20orf194	0	29	2	56	1	1
ENSG00000088876	ZNF343	2	12	1	27	0.219061	0.755089
ENSG00000088881	EBF4	0	12	0	51	1	1
ENSG00000088888	MAVS	0	35	0	267	1	1
ENSG00000088899	LZTS3	0	18	0	11	1	1
ENSG00000088970	KIZ	0	16	2	131	1	1
ENSG00000089006	SNX5	2	26	2	250	0.045572	0.490966
ENSG00000089022	MAPKAPK5	1	12	0	14	0.461538	1
ENSG00000089041	P2RX7	2	24	1	101	0.0940991	0.536472
ENSG00000089048	ESF1	1	20	0	17	0.540541	1
ENSG00000089053	ANAPC5	4	11	2	87	0.00121144	0.0741428
ENSG00000089057	SLC23A2	1	35	0	226	0.1341	0.606506
ENSG00000089063	TMEM230	0	14	0	229	1	1
ENSG00000089094	KDM2B	2	24	0	186	0.0125769	0.223036
ENSG00000089127	OAS1	1	14	86	232	0.998204	1
ENSG00000089154	GCN1	1	25	0	218	0.102881	0.544892
ENSG00000089157	RPLP0	0	26	9	161	1	1
ENSG00000089159	PXN	0	29	0	308	1	1
ENSG00000089169	RPH3A	1	14	82	217	0.998444	1
ENSG00000089177	KIF16B	2	27	0	15	0.407666	1
ENSG00000089280	FUS	0	22	0	252	1	1
ENSG00000089335	ZNF302	0	26	3	57	1	1
ENSG00000089351	GRAMD1A	2	20	21	310	0.414588	1
ENSG00000089486	CDIP1	0	19	0	184	1	1
ENSG00000089505	CMTM1	0	11	0	110	1	1
ENSG00000089639	GMIP	0	13	2	310	1	1
ENSG00000089685	BIRC5	3	25	0	72	0.0155996	0.254233
ENSG00000089693	MLF2	1	23	0	229	0.0912698	0.536472
ENSG00000089737	DDX24	1	18	0	241	0.0694981	0.536472
ENSG00000089775	ZBTB25	1	10	1	122	0.14631	0.623972
ENSG00000089902	RCOR1	0	18	1	277	1	1
ENSG00000089916	GPATCH2L	0	16	3	212	1	1
ENSG00000090006	LTBP4	0	16	0	241	1	1
ENSG00000090020	SLC9A1	0	15	0	205	1	1
ENSG00000090316	MAEA	1	16	30	301	0.815307	1
ENSG00000090339	ICAM1	0	10	1	320	1	1
ENSG00000090372	STRN4	2	18	1	307	0.00843005	0.193219
ENSG00000090432	MUL1	0	19	0	229	1	1
ENSG00000090447	TFAP4	0	10	0	72	1	1
ENSG00000090520	DNAJB11	0	14	0	186	1	1
ENSG00000090565	RAB11FIP3	1	18	1	170	0.182785	0.693683
ENSG00000090612	ZNF268	2	26	3	26	0.82513	1
ENSG00000090615	GOLGA3	0	34	3	304	1	1
ENSG00000090621	PABPC4	2	29	0	156	0.0238543	0.335945
ENSG00000090661	CERS4	0	19	5	282	1	1
ENSG00000090686	USP48	0	14	1	200	1	1
ENSG00000090857	PDPR	0	36	23	240	1	1
ENSG00000090861	AARS	0	24	0	239	1	1
ENSG00000090863	GLG1	1	30	0	302	0.0903614	0.536472
ENSG00000090905	TNRC6A	5	35	1	105	0.00380628	0.140104
ENSG00000090924	PLEKHG2	0	23	0	260	1	1
ENSG00000090971	NAT14	2	20	0	94	0.0294985	0.383081
ENSG00000090989	EXOC1	0	17	1	166	1	1
ENSG00000091009	RBM27	3	11	0	121	0.000440399	0.0395878
ENSG00000091073	DTX2	0	14	6	300	1	1
ENSG00000091136	LAMB1	0	37	0	37	1	1
ENSG00000091140	DLD	1	17	0	223	0.0708333	0.536472
ENSG00000091157	WDR7	0	24	2	117	1	1
ENSG00000091164	TXNL1	0	14	0	125	1	1
ENSG00000091409	ITGA6	2	27	3	122	0.222845	0.762203
ENSG00000091436	MAP3K20	2	28	0	149	0.0242681	0.337154
ENSG00000091490	SEL1L3	2	11	3	224	0.0184979	0.280788
ENSG00000091542	ALKBH5	1	21	0	276	0.0707071	0.536472
ENSG00000091592	NLRP1	0	10	0	357	1	1
ENSG00000091732	ZC3HC1	0	26	0	117	1	1
ENSG00000092020	PPP2R3C	1	18	7	189	0.523359	1
ENSG00000092036	HAUS4	1	19	5	230	0.382018	1
ENSG00000092068	SLC7A8	0	10	1	44	1	1
ENSG00000092094	OSGEP	1	24	0	242	0.0902256	0.536472
ENSG00000092098	RNF31	0	13	1	205	1	1
ENSG00000092148	HECTD1	2	22	0	138	0.0181604	0.277863
ENSG00000092199	HNRNPC	1	13	5	199	0.319138	0.944444
ENSG00000092201	SUPT16H	1	13	1	145	0.158268	0.644531
ENSG00000092203	TOX4	1	24	0	271	0.0813559	0.536472
ENSG00000092439	TRPM7	2	17	0	179	0.00711669	0.178787
ENSG00000092531	SNAP23	0	17	3	210	1	1
ENSG00000092621	PHGDH	0	22	0	47	1	1
ENSG00000092758	COL9A3	1	25	47	147	0.999869	1
ENSG00000092841	MYL6	1	12	0	107	0.10084	0.544892
ENSG00000092931	MFSD11	0	10	1	44	1	1
ENSG00000092964	DPYSL2	0	19	0	295	1	1
ENSG00000092978	GPATCH2	0	16	2	11	1	1
ENSG00000093010	COMT	1	18	0	248	0.0676692	0.536472
ENSG00000093167	LRRFIP2	0	12	0	215	1	1
ENSG00000093183	SEC22C	1	19	0	192	0.0900474	0.536472
ENSG00000094916	CBX5	1	24	0	154	0.134831	0.607428
ENSG00000094975	SUCO	0	28	0	82	1	1
ENSG00000095015	MAP3K1	1	18	1	189	0.166737	0.662864
ENSG00000095066	HOOK2	3	11	0	152	0.000232866	0.0271349
ENSG00000095139	ARCN1	3	14	1	107	0.00470242	0.151134
ENSG00000095209	TMEM38B	0	14	1	15	1	1
ENSG00000095261	PSMD5	3	20	0	200	0.000651228	0.0513221
ENSG00000095319	NUP188	0	22	0	197	1	1
ENSG00000095321	CRAT	0	13	1	175	1	1
ENSG00000095380	NANS	1	29	1	242	0.202925	0.731047
ENSG00000095397	DFNB31	1	17	1	103	0.264286	0.842752
ENSG00000095906	NUBP2	0	25	0	286	1	1
ENSG00000095951	HIVEP1	1	26	2	59	0.670862	1
ENSG00000096063	SRPK1	0	16	0	253	1	1
ENSG00000096070	BRPF3	1	26	0	172	0.131313	0.600512
ENSG00000096093	EFHC1	0	14	0	19	1	1
ENSG00000096401	CDC5L	4	15	0	100	0.000197444	0.0264442
ENSG00000096433	ITPR3	1	17	1	206	0.146972	0.623972
ENSG00000096654	ZNF184	0	24	0	19	1	1
ENSG00000096968	JAK2	2	19	8	211	0.195359	0.718766
ENSG00000097007	ABL1	1	28	1	178	0.253943	0.821317
ENSG00000097033	SH3GLB1	1	16	1	197	0.14492	0.62268
ENSG00000097046	CDC7	0	14	0	14	1	1
ENSG00000099139	PCSK5	0	13	1	53	1	1
ENSG00000099194	SCD	0	10	2	118	1	1
ENSG00000099204	ABLIM1	1	11	1	264	0.0785401	0.536472
ENSG00000099250	NRP1	4	11	2	21	0.08769	0.536472
ENSG00000099308	MAST3	1	13	5	264	0.252569	0.819533
ENSG00000099326	MZF1	2	24	1	218	0.0266589	0.358948
ENSG00000099331	MYO9B	2	29	1	353	0.0159446	0.258166
ENSG00000099377	HSD3B7	0	10	2	137	1	1
ENSG00000099622	CIRBP	0	12	0	191	1	1
ENSG00000099783	HNRNPM	0	14	3	215	1	1
ENSG00000099785	2022-03-02	2	26	0	291	0.00648884	0.169683
ENSG00000099795	NDUFB7	1	17	0	226	0.0699588	0.536472
ENSG00000099800	TIMM13	1	22	0	245	0.082397	0.536472
ENSG00000099804	CDC34	0	18	31	289	1	1
ENSG00000099810	MTAP	0	12	0	56	1	1
ENSG00000099817	POLR2E	0	14	0	351	1	1
ENSG00000099821	POLRMT	0	23	1	289	1	1
ENSG00000099822	HCN2	0	19	0	11	1	1
ENSG00000099875	MKNK2	2	14	0	319	0.00164623	0.0868874
ENSG00000099889	ARVCF	1	22	1	71	0.419121	1
ENSG00000099899	TRMT2A	1	20	0	197	0.0921659	0.536472
ENSG00000099904	ZDHHC8	1	18	1	216	0.148234	0.626389
ENSG00000099910	KLHL22	0	12	1	189	1	1
ENSG00000099917	MED15	0	13	0	281	1	1
ENSG00000099940	SNAP29	1	16	2	276	0.156047	0.640325
ENSG00000099949	LZTR1	0	22	0	265	1	1
ENSG00000099956	SMARCB1	0	13	1	157	1	1
ENSG00000099968	BCL2L13	1	15	0	285	0.05	0.504649
ENSG00000099991	CABIN1	0	16	1	206	1	1
ENSG00000099992	TBC1D10A	0	21	0	260	1	1
ENSG00000099995	SF3A1	1	16	1	270	0.108944	0.552498
ENSG00000099999	RNF215	1	23	0	102	0.184	0.696874
ENSG00000100003	SEC14L2	1	15	0	21	0.416667	1
ENSG00000100014	SPECC1L	0	16	0	201	1	1
ENSG00000100023	PPIL2	0	18	0	285	1	1
ENSG00000100027	YPEL1	0	11	0	160	1	1
ENSG00000100029	PES1	0	23	2	108	1	1
ENSG00000100034	PPM1F	0	16	6	290	1	1
ENSG00000100036	SLC35E4	0	15	0	14	1	1
ENSG00000100038	TOP3B	2	17	0	237	0.00423267	0.144944
ENSG00000100056	DGCR14	0	18	0	189	1	1
ENSG00000100092	SH3BP1	0	10	0	308	1	1
ENSG00000100097	LGALS1	0	13	2	140	1	1
ENSG00000100099	HPS4	0	25	0	162	1	1
ENSG00000100100	PIK3IP1	0	10	0	263	1	1
ENSG00000100104	SRRD	0	10	1	111	1	1
ENSG00000100105	PATZ1	0	11	0	115	1	1
ENSG00000100106	TRIOBP	0	16	0	217	1	1
ENSG00000100109	TFIP11	0	18	1	162	1	1
ENSG00000100116	GCAT	0	17	4	33	1	1
ENSG00000100129	EIF3L	0	15	2	191	1	1
ENSG00000100139	MICALL1	1	17	0	99	0.146552	0.623972
ENSG00000100162	CENPM	0	10	0	85	1	1
ENSG00000100201	DDX17	0	12	0	266	1	1
ENSG00000100207	TCF20	1	19	1	185	0.178016	0.683525
ENSG00000100211	CBY1	0	11	1	94	1	1
ENSG00000100220	RTCB	1	16	0	224	0.0666667	0.536472
ENSG00000100225	FBXO7	0	11	1	281	1	1
ENSG00000100226	GTPBP1	0	12	0	287	1	1
ENSG00000100227	POLDIP3	0	17	0	234	1	1
ENSG00000100228	RAB36	2	10	1	140	0.0116452	0.216812
ENSG00000100234	TIMP3	0	15	8	50	1	1
ENSG00000100239	PPP6R2	0	21	0	341	1	1
ENSG00000100241	SBF1	3	25	0	345	0.000274665	0.0287299
ENSG00000100242	SUN2	1	16	0	261	0.0577617	0.53548
ENSG00000100243	CYB5R3	0	12	0	195	1	1
ENSG00000100246	DNAL4	0	13	0	166	1	1
ENSG00000100258	LMF2	0	25	0	321	1	1
ENSG00000100263	RHBDD3	1	21	0	176	0.106599	0.548537
ENSG00000100266	PACSIN2	2	20	1	303	0.0105512	0.209528
ENSG00000100271	TTLL1	0	19	2	77	1	1
ENSG00000100280	AP1B1	1	19	1	258	0.132711	0.603247
ENSG00000100281	HMGXB4	1	10	1	70	0.235759	0.786275
ENSG00000100284	TOM1	0	10	2	307	1	1
ENSG00000100288	CHKB	0	12	3	226	1	1
ENSG00000100294	MCAT	0	13	2	97	1	1
ENSG00000100296	THOC5	1	20	0	287	0.0651466	0.536472
ENSG00000100297	MCM5	0	18	1	141	1	1
ENSG00000100299	ARSA	1	20	7	315	0.392166	1
ENSG00000100300	TSPO	0	13	0	273	1	1
ENSG00000100304	TTLL12	0	21	0	313	1	1
ENSG00000100316	RPL3	1	18	0	255	0.0659341	0.536472
ENSG00000100325	ASCC2	0	19	1	263	1	1
ENSG00000100330	MTMR3	0	19	0	313	1	1
ENSG00000100335	MIEF1	0	15	0	123	1	1
ENSG00000100345	MYH9	1	23	41	333	0.949558	1
ENSG00000100347	SAMM50	0	23	0	269	1	1
ENSG00000100359	SGSM3	0	12	2	141	1	1
ENSG00000100360	IFT27	0	10	1	63	1	1
ENSG00000100364	KIAA0930	0	10	4	316	1	1
ENSG00000100376	FAM118A	0	16	73	228	1	1
ENSG00000100393	EP300	2	23	0	210	0.00936066	0.202972
ENSG00000100395	L3MBTL2	2	21	0	249	0.00578273	0.16718
ENSG00000100401	RANGAP1	0	14	0	298	1	1
ENSG00000100403	ZC3H7B	2	20	0	170	0.010582	0.209528
ENSG00000100412	ACO2	0	17	0	249	1	1
ENSG00000100413	POLR3H	0	10	1	66	1	1
ENSG00000100416	TRMU	2	11	0	157	0.00392073	0.140104
ENSG00000100422	CERK	2	24	0	314	0.0048461	0.15402
ENSG00000100425	BRD1	5	15	0	182	1.28e-06	0.000735385
ENSG00000100426	ZBED4	0	18	2	76	1	1
ENSG00000100427	MLC1	0	16	4	225	1	1
ENSG00000100429	HDAC10	1	12	0	232	0.0491803	0.504649
ENSG00000100441	KHNYN	4	22	2	305	0.00021414	0.0267814
ENSG00000100445	SDR39U1	3	11	0	152	0.000232866	0.0271349
ENSG00000100461	RBM23	0	26	1	309	1	1
ENSG00000100473	COCH	1	12	0	14	0.461538	1
ENSG00000100483	VCPKMT	0	10	0	221	1	1
ENSG00000100485	SOS2	0	17	4	224	1	1
ENSG00000100490	CDKL1	0	12	4	28	1	1
ENSG00000100503	NIN	3	29	0	329	0.000481857	0.041375
ENSG00000100504	PYGL	2	17	10	304	0.127447	0.590359
ENSG00000100505	TRIM9	2	20	0	12	0.383065	1
ENSG00000100564	PIGH	0	11	1	181	1	1
ENSG00000100577	GSTZ1	1	21	1	160	0.219153	0.755089
ENSG00000100591	AHSA1	3	19	1	250	0.00115369	0.0721432
ENSG00000100592	DAAM1	0	16	1	12	1	1
ENSG00000100596	SPTLC2	1	11	2	241	0.125798	0.588133
ENSG00000100600	LGMN	1	23	1	130	0.278896	0.873904
ENSG00000100601	ALKBH1	0	14	0	153	1	1
ENSG00000100603	SNW1	1	22	1	233	0.165416	0.661507
ENSG00000100605	ITPK1	1	26	0	353	0.0686016	0.536472
ENSG00000100644	HIF1A	1	12	1	166	0.130642	0.599348
ENSG00000100650	SRSF5	1	16	0	159	0.0914286	0.536472
ENSG00000100711	ZFYVE21	0	20	0	213	1	1
ENSG00000100714	MTHFD1	0	22	0	166	1	1
ENSG00000100726	TELO2	1	26	3	303	0.281706	0.879357
ENSG00000100731	PCNX1	0	19	5	251	1	1
ENSG00000100744	GSKIP	1	17	0	107	0.137097	0.610222
ENSG00000100749	VRK1	1	20	0	127	0.136054	0.608328
ENSG00000100764	PSMC1	0	14	0	203	1	1
ENSG00000100796	SMEK1	0	18	1	236	1	1
ENSG00000100802	C14orf93	1	14	0	140	0.0909091	0.536472
ENSG00000100804	PSMB5	0	11	0	46	1	1
ENSG00000100811	YY1	1	10	1	146	0.124483	0.587973
ENSG00000100813	ACIN1	2	23	0	294	0.00505131	0.157936
ENSG00000100814	CCNB1IP1	0	11	2	126	1	1
ENSG00000100815	TRIP11	1	17	0	96	0.150442	0.63221
ENSG00000100823	APEX1	0	17	0	217	1	1
ENSG00000100865	CINP	1	26	1	278	0.163996	0.657012
ENSG00000100883	SRP54	1	14	0	299	0.0447284	0.486032
ENSG00000100888	CHD8	1	18	1	80	0.335157	0.976776
ENSG00000100890	KIAA0391	1	27	0	123	0.18	0.688066
ENSG00000100897	DCAF11	2	17	2	225	0.0257019	0.349558
ENSG00000100902	PSMA6	1	19	0	151	0.111765	0.558307
ENSG00000100906	NFKBIA	1	26	0	312	0.0769231	0.536472
ENSG00000100911	PSME2	0	13	0	174	1	1
ENSG00000100926	TM9SF1	3	15	3	226	0.00351808	0.136754
ENSG00000100934	SEC23A	1	22	1	149	0.241417	0.796839
ENSG00000100938	GMPR2	0	11	0	204	1	1
ENSG00000100941	PNN	0	23	0	259	1	1
ENSG00000100949	RABGGTA	1	17	0	197	0.0794393	0.536472
ENSG00000100979	PLTP	1	15	0	13	0.535714	1
ENSG00000100982	PCIF1	1	16	0	166	0.0879121	0.536472
ENSG00000100983	GSS	2	13	0	61	0.0288782	0.376726
ENSG00000100991	TRPC4AP	0	17	0	313	1	1
ENSG00000100994	PYGB	0	28	0	268	1	1
ENSG00000100997	ABHD12	0	24	0	251	1	1
ENSG00000101019	UQCC1	0	21	1	101	1	1
ENSG00000101040	ZMYND8	0	14	0	65	1	1
ENSG00000101052	IFT52	0	14	0	90	1	1
ENSG00000101057	MYBL2	0	16	0	88	1	1
ENSG00000101104	PABPC1L	0	12	1	251	1	1
ENSG00000101109	STK4	0	20	1	240	1	1
ENSG00000101126	ADNP	0	13	0	172	1	1
ENSG00000101158	NELFCD	0	27	1	247	1	1
ENSG00000101160	CTSZ	3	14	0	303	6.92e-05	0.0120664
ENSG00000101161	PRPF6	0	21	2	210	1	1
ENSG00000101181	MTG2	1	28	0	307	0.0835821	0.536472
ENSG00000101182	PSMA7	0	12	0	155	1	1
ENSG00000101187	SLCO4A1	1	18	1	259	0.125961	0.588133
ENSG00000101190	TCFL5	0	14	4	82	1	1
ENSG00000101191	DIDO1	1	31	1	274	0.193248	0.715417
ENSG00000101193	GID8	0	26	0	239	1	1
ENSG00000101210	EEF1A2	0	18	2	49	1	1
ENSG00000101216	GMEB2	1	19	0	249	0.0708955	0.536472
ENSG00000101220	C20orf27	0	25	3	207	1	1
ENSG00000101224	CDC25B	0	22	0	240	1	1
ENSG00000101255	TRIB3	0	31	4	214	1	1
ENSG00000101265	RASSF2	0	20	2	349	1	1
ENSG00000101294	HM13	0	12	15	167	1	1
ENSG00000101298	SNPH	1	15	1	66	0.337963	0.980485
ENSG00000101310	SEC23B	0	22	3	204	1	1
ENSG00000101337	TM9SF4	1	19	0	229	0.0766129	0.536472
ENSG00000101343	CRNKL1	0	22	0	110	1	1
ENSG00000101346	POFUT1	0	18	0	37	1	1
ENSG00000101350	KIF3B	0	19	0	187	1	1
ENSG00000101361	NOP56	0	30	0	297	1	1
ENSG00000101363	MANBAL	0	14	2	299	1	1
ENSG00000101384	JAG1	0	31	0	37	1	1
ENSG00000101391	CDK5RAP1	0	20	0	108	1	1
ENSG00000101412	E2F1	0	13	0	54	1	1
ENSG00000101417	PXMP4	3	24	0	38	0.0535167	0.52007
ENSG00000101442	ACTR5	0	18	0	199	1	1
ENSG00000101452	DHX35	0	25	0	36	1	1
ENSG00000101473	ACOT8	0	22	0	64	1	1
ENSG00000101474	APMAP	0	18	11	302	1	1
ENSG00000101493	ZNF516	1	17	0	329	0.0491329	0.504649
ENSG00000101544	ADNP2	2	27	3	150	0.167386	0.664119
ENSG00000101546	RBFA	0	25	0	176	1	1
ENSG00000101558	VAPA	1	10	3	262	0.139877	0.613212
ENSG00000101574	METTL4	0	11	2	160	1	1
ENSG00000101577	LPIN2	1	17	4	343	0.21593	0.749242
ENSG00000101596	SMCHD1	2	28	2	300	0.0379238	0.438985
ENSG00000101639	CEP192	0	34	3	154	1	1
ENSG00000101654	RNMT	0	16	0	250	1	1
ENSG00000101745	ANKRD12	0	21	0	145	1	1
ENSG00000101751	POLI	0	15	1	95	1	1
ENSG00000101752	MIB1	2	11	0	103	0.00853905	0.193579
ENSG00000102189	EEA1	1	28	0	62	0.311111	0.930261
ENSG00000102547	CAB39L	0	12	0	22	1	1
ENSG00000102572	STK24	0	14	0	261	1	1
ENSG00000102606	ARHGEF7	0	15	1	274	1	1
ENSG00000102699	PARP4	2	27	6	299	0.135657	0.608288
ENSG00000102710	SUPT20H	1	18	0	195	0.084507	0.536472
ENSG00000102753	KPNA3	1	15	0	189	0.0735294	0.536472
ENSG00000102763	VWA8	0	15	2	74	1	1
ENSG00000102804	TSC22D1	1	12	1	106	0.193829	0.716466
ENSG00000102858	MGRN1	1	13	12	335	0.395801	1
ENSG00000102900	NUP93	1	27	1	182	0.242225	0.798579
ENSG00000102908	NFAT5	1	10	1	240	0.0785542	0.536472
ENSG00000102910	LONP2	2	12	0	138	0.00590604	0.16718
ENSG00000102967	DHODH	0	10	1	44	1	1
ENSG00000102977	ACD	0	21	0	210	1	1
ENSG00000102978	POLR2C	0	12	0	142	1	1
ENSG00000103018	CYB5B	1	12	0	217	0.0524017	0.512699
ENSG00000103037	SETD6	0	19	1	54	1	1
ENSG00000103042	SLC38A7	0	20	2	145	1	1
ENSG00000103051	COG4	0	24	0	275	1	1
ENSG00000103061	SLC7A6OS	0	21	0	161	1	1
ENSG00000103064	SLC7A6	0	10	0	226	1	1
ENSG00000103091	WDR59	0	12	1	185	1	1
ENSG00000103111	MON1B	1	28	0	276	0.0921053	0.536472
ENSG00000103121	CMC2	0	19	0	153	1	1
ENSG00000103126	AXIN1	0	31	1	323	1	1
ENSG00000103145	HCFC1R1	0	11	0	140	1	1
ENSG00000103160	HSDL1	1	15	0	174	0.0793651	0.536472
ENSG00000103168	TAF1C	0	30	3	289	1	1
ENSG00000103174	NAGPA	1	19	1	270	0.127379	0.590359
ENSG00000103187	COTL1	0	20	2	348	1	1
ENSG00000103194	USP10	0	25	11	300	1	1
ENSG00000103197	TSC2	1	25	0	244	0.0929368	0.536472
ENSG00000103199	ZNF500	0	28	1	132	1	1
ENSG00000103202	NME4	1	24	6	218	0.523285	1
ENSG00000103222	ABCC1	1	19	0	300	0.0595611	0.536472
ENSG00000103227	LMF1	2	31	2	152	0.133834	0.605783
ENSG00000103245	NARFL	0	23	1	203	1	1
ENSG00000103248	MTHFSD	0	21	5	169	1	1
ENSG00000103249	CLCN7	1	29	20	334	0.834832	1
ENSG00000103253	HAGHL	0	23	0	121	1	1
ENSG00000103254	FAM173A	0	14	2	117	1	1
ENSG00000103260	METRN	2	20	0	21	0.231707	0.780522
ENSG00000103274	NUBP1	0	20	0	81	1	1
ENSG00000103275	UBE2I	0	22	1	254	1	1
ENSG00000103319	EEF2K	0	14	0	28	1	1
ENSG00000103326	CAPN15	0	29	2	339	1	1
ENSG00000103335	PIEZO1	1	37	0	329	0.101093	0.544892
ENSG00000103342	GSPT1	1	22	0	284	0.0718954	0.536472
ENSG00000103343	ZNF174	0	25	0	97	1	1
ENSG00000103351	CLUAP1	1	20	2	27	0.819611	1
ENSG00000103356	EARS2	0	12	0	42	1	1
ENSG00000103363	ELOB	0	27	0	245	1	1
ENSG00000103365	GGA2	1	13	1	202	0.11754	0.57281
ENSG00000103381	CPPED1	1	10	2	234	0.118447	0.57281
ENSG00000103404	USP31	2	31	0	10	0.567073	1
ENSG00000103423	DNAJA3	0	18	0	162	1	1
ENSG00000103426	CORO7-PAM16	1	19	0	52	0.267606	0.848229
ENSG00000103429	BFAR	0	23	0	210	1	1
ENSG00000103479	RBL2	1	25	0	244	0.0929368	0.536472
ENSG00000103489	XYLT1	1	23	2	171	0.316606	0.938882
ENSG00000103495	MAZ	2	10	1	126	0.0141206	0.237128
ENSG00000103507	BCKDK	0	16	0	197	1	1
ENSG00000103510	KAT8	0	12	0	267	1	1
ENSG00000103540	CCP110	0	29	0	92	1	1
ENSG00000103544	C16orf62	2	30	1	217	0.0396818	0.453855
ENSG00000103591	AAGAB	0	14	0	258	1	1
ENSG00000103647	CORO2B	0	22	0	16	1	1
ENSG00000103653	CSK	1	12	3	231	0.184432	0.697592
ENSG00000103657	HERC1	5	33	1	289	4.72e-05	0.00904765
ENSG00000103811	CTSH	2	17	8	281	0.105259	0.54754
ENSG00000103876	FAH	1	13	0	117	0.1	0.544892
ENSG00000103932	RPAP1	1	29	1	92	0.423416	1
ENSG00000103966	EHD4	1	24	1	257	0.163803	0.657012
ENSG00000103978	TMEM87A	1	10	0	77	0.114943	0.564763
ENSG00000103994	ZNF106	0	18	2	186	1	1
ENSG00000104047	DTWD1	0	12	0	26	1	1
ENSG00000104093	DMXL2	1	27	3	168	0.45182	1
ENSG00000104133	SPG11	1	27	0	213	0.1125	0.559389
ENSG00000104205	SGK3	1	10	0	46	0.178571	0.683969
ENSG00000104267	CA2	0	14	1	179	1	1
ENSG00000104320	NBN	0	11	1	232	1	1
ENSG00000104325	DECR1	2	11	9	119	0.234518	0.785031
ENSG00000104341	LAPTM4B	0	16	5	95	1	1
ENSG00000104365	IKBKB	0	12	0	144	1	1
ENSG00000104419	NDRG1	0	13	2	324	1	1
ENSG00000104442	ARMC1	0	14	2	98	1	1
ENSG00000104447	TRPS1	2	18	3	89	0.196143	0.719649
ENSG00000104450	SPAG1	1	12	2	48	0.494565	1
ENSG00000104472	CHRAC1	0	11	0	158	1	1
ENSG00000104497	SNX16	1	12	3	57	0.543077	1
ENSG00000104517	UBR5	3	25	0	185	0.00151165	0.0820425
ENSG00000104518	GSDMD	0	15	18	322	1	1
ENSG00000104522	TSTA3	0	18	1	198	1	1
ENSG00000104524	PYCRL	2	20	1	33	0.316315	0.938584
ENSG00000104529	EEF1D	0	22	0	284	1	1
ENSG00000104613	INTS10	0	13	0	100	1	1
ENSG00000104626	ERI1	0	29	9	251	1	1
ENSG00000104635	SLC39A14	0	25	0	37	1	1
ENSG00000104643	MTMR9	0	26	1	84	1	1
ENSG00000104660	LEPROTL1	0	11	2	158	1	1
ENSG00000104679	R3HCC1	1	28	0	294	0.0869565	0.536472
ENSG00000104714	ERICH1	0	19	124	305	1	1
ENSG00000104731	KLHDC4	1	25	7	265	0.518325	1
ENSG00000104738	MCM4	1	13	0	49	0.209677	0.740955
ENSG00000104763	ASAH1	0	27	2	308	1	1
ENSG00000104765	BNIP3L	1	29	0	294	0.0897833	0.536472
ENSG00000104774	MAN2B1	0	26	0	304	1	1
ENSG00000104805	NUCB1	1	20	0	276	0.0675676	0.536472
ENSG00000104812	GYS1	1	18	1	235	0.137493	0.610337
ENSG00000104823	ECH1	0	19	0	214	1	1
ENSG00000104824	HNRNPL	1	11	1	209	0.0977169	0.541401
ENSG00000104825	NFKBIB	0	23	0	288	1	1
ENSG00000104833	TUBB4A	0	10	2	64	1	1
ENSG00000104835	SARS2	0	20	1	163	1	1
ENSG00000104852	SNRNP70	0	15	0	334	1	1
ENSG00000104853	CLPTM1	1	12	0	265	0.0433213	0.476534
ENSG00000104866	PPP1R37	6	21	1	185	3.6e-06	0.00159493
ENSG00000104870	FCGRT	0	11	1	253	1	1
ENSG00000104872	PIH1D1	1	21	0	252	0.0769231	0.536472
ENSG00000104880	ARHGEF18	0	24	0	297	1	1
ENSG00000104883	PEX11G	0	11	42	77	1	1
ENSG00000104884	ERCC2	0	20	1	164	1	1
ENSG00000104885	DOT1L	0	15	0	264	1	1
ENSG00000104904	OAZ1	0	14	1	299	1	1
ENSG00000104946	TBC1D17	0	15	0	230	1	1
ENSG00000104957	CCDC130	1	17	1	208	0.145714	0.623972
ENSG00000104960	PTOV1	1	19	0	280	0.0635452	0.536472
ENSG00000104964	AES	1	21	2	307	0.180554	0.689403
ENSG00000104969	SGTA	1	13	0	197	0.0619048	0.536472
ENSG00000104976	SNAPC2	0	12	0	253	1	1
ENSG00000104979	C19orf53	0	17	1	163	1	1
ENSG00000105011	ASF1B	0	20	0	129	1	1
ENSG00000105053	VRK3	1	12	4	207	0.247572	0.810171
ENSG00000105063	PPP6R1	0	22	0	275	1	1
ENSG00000105072	C19orf44	0	14	0	201	1	1
ENSG00000105088	OLFM2	1	19	0	29	0.395833	1
ENSG00000105135	ILVBL	0	28	0	263	1	1
ENSG00000105136	ZNF419	1	20	4	57	0.788078	1
ENSG00000105173	CCNE1	0	15	0	19	1	1
ENSG00000105186	ANKRD27	0	21	0	216	1	1
ENSG00000105193	RPS16	0	18	0	275	1	1
ENSG00000105220	GPI	0	16	1	201	1	1
ENSG00000105221	AKT2	0	21	0	289	1	1
ENSG00000105223	PLD3	1	14	0	222	0.059322	0.536472
ENSG00000105229	PIAS4	3	26	1	251	0.00278114	0.118518
ENSG00000105245	NUMBL	0	12	1	73	1	1
ENSG00000105248	CCDC94	0	15	2	176	1	1
ENSG00000105255	FSD1	0	19	2	75	1	1
ENSG00000105258	POLR2I	0	12	1	77	1	1
ENSG00000105281	SLC1A5	1	22	0	300	0.068323	0.536472
ENSG00000105298	CACTIN	2	22	0	211	0.00854669	0.193579
ENSG00000105321	CCDC9	1	20	0	295	0.0634921	0.536472
ENSG00000105325	FZR1	1	19	0	263	0.0673759	0.536472
ENSG00000105341	ATP5SL	1	17	0	207	0.0758929	0.536472
ENSG00000105355	PLIN3	1	32	0	318	0.0914286	0.536472
ENSG00000105364	MRPL4	0	23	0	256	1	1
ENSG00000105373	GLTSCR2	1	24	1	259	0.162695	0.654075
ENSG00000105379	ETFB	0	18	2	207	1	1
ENSG00000105393	BABAM1	0	19	0	167	1	1
ENSG00000105397	TYK2	0	27	0	301	1	1
ENSG00000105404	RABAC1	0	17	0	179	1	1
ENSG00000105426	PTPRS	0	31	2	20	1	1
ENSG00000105447	GRWD1	1	13	0	89	0.127451	0.590359
ENSG00000105472	CLEC11A	0	16	2	216	1	1
ENSG00000105483	CARD8	1	23	3	341	0.230647	0.779575
ENSG00000105486	LIG1	1	21	2	232	0.229748	0.777036
ENSG00000105497	ZNF175	0	17	2	25	1	1
ENSG00000105499	PLA2G4C	1	19	0	22	0.463415	1
ENSG00000105552	BCAT2	0	10	0	87	1	1
ENSG00000105556	MIER2	0	10	2	125	1	1
ENSG00000105568	PPP2R1A	0	14	1	113	1	1
ENSG00000105583	WDR83OS	0	10	0	124	1	1
ENSG00000105607	GCDH	1	15	0	221	0.0635593	0.536472
ENSG00000105612	DNASE2	0	12	0	140	1	1
ENSG00000105618	PRPF31	0	17	0	153	1	1
ENSG00000105640	RPL18A	0	19	1	35	1	1
ENSG00000105649	RAB3A	0	14	1	111	1	1
ENSG00000105655	ISYNA1	1	21	0	200	0.0950226	0.536472
ENSG00000105656	ELL	0	10	0	273	1	1
ENSG00000105669	COPE	0	21	0	296	1	1
ENSG00000105671	DDX49	0	10	0	225	1	1
ENSG00000105676	ARMC6	0	12	1	169	1	1
ENSG00000105677	TMEM147	0	17	0	183	1	1
ENSG00000105698	USF2	0	12	0	256	1	1
ENSG00000105699	LSR	0	14	0	112	1	1
ENSG00000105700	KXD1	0	19	0	226	1	1
ENSG00000105708	ZNF14	1	16	2	37	0.668317	1
ENSG00000105722	ERF	0	12	0	129	1	1
ENSG00000105726	ATP13A1	1	13	0	123	0.0955882	0.538081
ENSG00000105738	SIPA1L3	3	25	0	91	0.00907441	0.200802
ENSG00000105778	AVL9	0	27	3	267	1	1
ENSG00000105793	GTPBP10	0	23	3	59	1	1
ENSG00000105810	CDK6	1	17	1	58	0.404324	1
ENSG00000105819	PMPCB	1	10	1	81	0.208791	0.740442
ENSG00000105821	DNAJC2	1	11	0	38	0.22449	0.766008
ENSG00000105829	BET1	0	11	2	51	1	1
ENSG00000105854	PON2	1	11	0	72	0.13253	0.603247
ENSG00000105856	HBP1	0	19	0	165	1	1
ENSG00000105875	WDR91	3	22	1	242	0.00192082	0.0960913
ENSG00000105877	DNAH11	0	28	2	180	1	1
ENSG00000105879	CBLL1	0	10	0	125	1	1
ENSG00000105939	ZC3HAV1	1	29	3	318	0.295792	0.904533
ENSG00000105953	OGDH	0	21	0	265	1	1
ENSG00000105968	H2AFV	0	15	0	227	1	1
ENSG00000105982	RNF32	3	24	3	153	0.0335384	0.414049
ENSG00000105983	LMBR1	1	32	1	198	0.259427	0.833323
ENSG00000106009	BRAT1	0	30	0	246	1	1
ENSG00000106012	IQCE	2	35	3	182	0.184348	0.697592
ENSG00000106052	TAX1BP1	1	19	1	116	0.262576	0.839689
ENSG00000106066	CPVL	2	28	2	287	0.0409332	0.458147
ENSG00000106069	CHN2	3	15	1	69	0.0169785	0.26615
ENSG00000106070	GRB10	2	27	21	268	0.646312	1
ENSG00000106077	ABHD11	0	28	2	228	1	1
ENSG00000106086	PLEKHA8	1	13	1	15	0.722222	1
ENSG00000106089	STX1A	0	27	0	110	1	1
ENSG00000106100	NOD1	2	27	1	82	0.151033	0.633566
ENSG00000106105	GARS	0	12	0	208	1	1
ENSG00000106153	CHCHD2	0	17	2	149	1	1
ENSG00000106246	PTCD1	1	19	0	98	0.162393	0.65332
ENSG00000106263	EIF3B	1	22	1	198	0.190411	0.70743
ENSG00000106266	SNX8	1	17	0	79	0.177083	0.682358
ENSG00000106268	NUDT1	0	18	2	130	1	1
ENSG00000106290	TAF6	0	22	0	197	1	1
ENSG00000106299	WASL	0	21	1	39	1	1
ENSG00000106305	AIMP2	0	28	0	214	1	1
ENSG00000106344	RBM28	0	25	1	143	1	1
ENSG00000106346	USP42	0	20	0	43	1	1
ENSG00000106348	IMPDH1	0	28	0	319	1	1
ENSG00000106351	AGFG2	0	10	0	81	1	1
ENSG00000106355	LSM5	0	13	0	127	1	1
ENSG00000106366	SERPINE1	1	29	2	116	0.490676	1
ENSG00000106367	AP1S1	1	24	0	160	0.130435	0.598876
ENSG00000106392	C1GALT1	0	19	5	195	1	1
ENSG00000106397	PLOD3	1	23	0	144	0.137725	0.610632
ENSG00000106400	ZNHIT1	1	17	12	156	0.752524	1
ENSG00000106404	CLDN15	1	19	0	224	0.0781893	0.536472
ENSG00000106415	GLCCI1	0	25	4	164	1	1
ENSG00000106443	PHF14	0	28	0	95	1	1
ENSG00000106459	NRF1	2	18	0	226	0.0051609	0.158457
ENSG00000106460	TMEM106B	0	18	2	168	1	1
ENSG00000106479	ZNF862	0	25	1	290	1	1
ENSG00000106484	MEST	13	19	0	10	0.0003998	0.0370976
ENSG00000106524	ANKMY2	0	32	0	139	1	1
ENSG00000106537	TSPAN13	0	26	1	63	1	1
ENSG00000106546	AHR	2	11	0	65	0.0192982	0.290636
ENSG00000106560	GIMAP2	1	21	1	252	0.14819	0.626389
ENSG00000106565	TMEM176B	1	11	135	258	0.999653	1
ENSG00000106591	MRPL32	0	10	1	97	1	1
ENSG00000106603	COA1	1	27	2	209	0.306599	0.922524
ENSG00000106605	BLVRA	0	30	0	262	1	1
ENSG00000106608	URGCP	0	34	1	151	1	1
ENSG00000106624	AEBP1	1	27	0	128	0.174194	0.676661
ENSG00000106628	POLD2	0	21	0	50	1	1
ENSG00000106638	TBL2	1	33	0	174	0.15942	0.646387
ENSG00000106665	CLIP2	2	34	0	146	0.0348231	0.425344
ENSG00000106733	NMRK1	0	14	12	291	1	1
ENSG00000106771	TMEM245	1	29	1	141	0.312913	0.933225
ENSG00000106772	PRUNE2	0	28	31	78	1	1
ENSG00000106785	TRIM14	1	21	1	267	0.140752	0.615693
ENSG00000106799	TGFBR1	1	11	1	191	0.106202	0.548406
ENSG00000106853	PTGR1	0	12	0	26	1	1
ENSG00000106868	SUSD1	0	17	1	193	1	1
ENSG00000106948	AKNA	1	23	0	352	0.0613333	0.536472
ENSG00000106992	AK1	2	18	2	140	0.06426	0.536472
ENSG00000106993	CDC37L1	0	11	0	115	1	1
ENSG00000107021	TBC1D13	1	11	2	195	0.152495	0.635726
ENSG00000107036	RIC1	3	18	1	200	0.00181631	0.0932968
ENSG00000107077	KDM4C	2	26	2	300	0.0332714	0.412652
ENSG00000107104	KANK1	3	27	1	23	0.368324	1
ENSG00000107130	NCS1	1	18	1	19	0.743243	1
ENSG00000107140	TESK1	1	17	0	198	0.0790698	0.536472
ENSG00000107185	RGP1	1	20	1	236	0.150429	0.63221
ENSG00000107201	DDX58	0	15	19	250	1	1
ENSG00000107263	RAPGEF1	0	15	10	325	1	1
ENSG00000107281	NPDC1	1	18	2	210	0.219524	0.755464
ENSG00000107290	SETX	2	23	1	242	0.0205431	0.303037
ENSG00000107331	ABCA2	1	26	0	270	0.0878378	0.536472
ENSG00000107338	SHB	0	27	0	66	1	1
ENSG00000107371	EXOSC3	1	26	1	197	0.220054	0.756255
ENSG00000107372	ZFAND5	0	13	0	268	1	1
ENSG00000107438	PDLIM1	2	11	0	293	0.0011942	0.0738734
ENSG00000107554	DNMBP	1	11	3	204	0.190707	0.70783
ENSG00000107651	SEC23IP	1	10	0	195	0.0487805	0.502929
ENSG00000107771	CCSER2	2	12	1	158	0.0132365	0.2282
ENSG00000107816	LZTS2	1	14	0	183	0.071066	0.536472
ENSG00000107862	GBF1	2	10	0	179	0.00253293	0.112961
ENSG00000107937	GTPBP4	1	12	1	151	0.14224	0.618525
ENSG00000107957	SH3PXD2A	0	10	1	38	1	1
ENSG00000107959	PITRM1	1	14	0	328	0.0409357	0.458147
ENSG00000108021	FAM208B	4	10	3	89	0.00166951	0.0873155
ENSG00000108091	CCDC6	1	11	1	173	0.116298	0.567967
ENSG00000108107	RPL28	0	17	1	267	1	1
ENSG00000108175	ZMIZ1	0	10	2	311	1	1
ENSG00000108256	NUFIP2	1	16	0	255	0.0590406	0.536472
ENSG00000108262	GIT1	1	21	0	165	0.112903	0.559981
ENSG00000108306	FBXL20	0	11	1	110	1	1
ENSG00000108312	UBTF	0	20	1	216	1	1
ENSG00000108344	PSMD3	0	23	1	245	1	1
ENSG00000108387	2022-09-04	0	21	2	52	1	1
ENSG00000108389	MTMR4	0	26	0	224	1	1
ENSG00000108423	TUBD1	0	18	0	19	1	1
ENSG00000108424	KPNB1	2	12	6	133	0.133037	0.603247
ENSG00000108433	GOSR2	1	25	0	268	0.0853242	0.536472
ENSG00000108439	PNPO	1	19	0	109	0.148438	0.62653
ENSG00000108443	RPS6KB1	0	20	1	144	1	1
ENSG00000108465	CDK5RAP3	0	27	1	289	1	1
ENSG00000108469	RECQL5	1	21	0	207	0.0921053	0.536472
ENSG00000108474	PIGL	1	17	0	66	0.204819	0.732789
ENSG00000108509	CAMTA2	0	15	2	255	1	1
ENSG00000108510	MED13	2	18	1	93	0.0678268	0.536472
ENSG00000108557	RAI1	0	22	0	80	1	1
ENSG00000108559	NUP88	2	19	0	210	0.00655022	0.169745
ENSG00000108561	C1QBP	1	10	0	122	0.0757576	0.536472
ENSG00000108578	BLMH	1	15	0	146	0.0931677	0.536472
ENSG00000108587	GOSR1	0	11	1	155	1	1
ENSG00000108588	CCDC47	0	10	0	210	1	1
ENSG00000108591	DRG2	0	15	1	211	1	1
ENSG00000108592	FTSJ3	1	23	0	176	0.115578	0.566371
ENSG00000108599	AKAP10	0	20	1	216	1	1
ENSG00000108604	SMARCD2	2	18	1	206	0.0174946	0.272018
ENSG00000108639	SYNGR2	1	25	0	265	0.0862069	0.536472
ENSG00000108651	UTP6	1	16	0	175	0.0837696	0.536472
ENSG00000108654	DDX5	1	16	3	123	0.390353	1
ENSG00000108669	CYTH1	0	21	0	320	1	1
ENSG00000108679	LGALS3BP	0	16	0	69	1	1
ENSG00000108691	CCL2	0	10	1	18	1	1
ENSG00000108786	HSD17B1	0	18	6	68	1	1
ENSG00000108788	MLX	0	20	0	290	1	1
ENSG00000108819	PPP1R9B	0	20	0	291	1	1
ENSG00000108826	MRPL27	1	15	0	42	0.263158	0.841082
ENSG00000108828	VAT1	0	17	0	226	1	1
ENSG00000108840	HDAC5	2	20	0	232	0.00600772	0.16718
ENSG00000108848	LUC7L3	0	10	1	63	1	1
ENSG00000108883	EFTUD2	2	23	1	137	0.0543826	0.52582
ENSG00000108946	PRKAR1A	0	15	0	300	1	1
ENSG00000108963	DPH1	0	25	0	286	1	1
ENSG00000109046	WSB1	0	17	1	235	1	1
ENSG00000109065	NAT9	0	13	0	226	1	1
ENSG00000109066	TMEM104	1	22	1	226	0.169877	0.669845
ENSG00000109099	PMP22	0	20	1	47	1	1
ENSG00000109103	UNC119	0	19	0	138	1	1
ENSG00000109111	SUPT6H	2	22	0	225	0.00760344	0.183344
ENSG00000109113	RAB34	2	12	0	41	0.0478955	0.502191
ENSG00000109118	PHF12	2	12	0	97	0.011213	0.213605
ENSG00000109184	DCUN1D4	2	10	0	28	0.0640114	0.536472
ENSG00000109323	MANBA	0	24	5	292	1	1
ENSG00000109332	UBE2D3	1	18	0	276	0.0612245	0.536472
ENSG00000109390	NDUFC1	1	11	0	27	0.289474	0.893424
ENSG00000109436	TBC1D9	1	25	1	74	0.443208	1
ENSG00000109445	ZNF330	0	15	0	161	1	1
ENSG00000109452	INPP4B	0	21	0	89	1	1
ENSG00000109466	KLHL2	0	18	13	188	1	1
ENSG00000109501	WFS1	3	23	0	54	0.0242105	0.337154
ENSG00000109536	FRG1	0	14	6	188	1	1
ENSG00000109572	CLCN3	1	17	1	86	0.304207	0.920003
ENSG00000109586	GALNT7	0	13	1	74	1	1
ENSG00000109736	MFSD10	0	11	0	209	1	1
ENSG00000109756	RAPGEF2	0	22	0	176	1	1
ENSG00000109775	UFSP2	0	14	2	77	1	1
ENSG00000109787	KLF3	1	16	0	304	0.05	0.504649
ENSG00000109790	KLHL5	1	15	1	109	0.228167	0.773964
ENSG00000109805	NCAPG	0	19	2	16	1	1
ENSG00000109814	UGDH	0	12	1	55	1	1
ENSG00000109861	CTSC	0	18	2	220	1	1
ENSG00000109917	ZPR1	0	10	0	82	1	1
ENSG00000109919	MTCH2	1	20	0	18	0.526316	1
ENSG00000109920	FNBP4	1	10	0	137	0.0680272	0.536472
ENSG00000109971	HSPA8	2	29	0	252	0.0103203	0.209528
ENSG00000110002	VWA5A	0	12	1	120	1	1
ENSG00000110011	DNAJC4	0	10	2	139	1	1
ENSG00000110013	SIAE	2	11	0	44	0.037037	0.434845
ENSG00000110025	SNX15	0	25	0	192	1	1
ENSG00000110031	LPXN	0	16	1	215	1	1
ENSG00000110046	ATG2A	0	15	0	233	1	1
ENSG00000110047	EHD1	2	25	0	283	0.00634545	0.167607
ENSG00000110060	PUS3	4	27	1	117	0.00443668	0.146691
ENSG00000110063	DCPS	1	22	0	306	0.0670732	0.536472
ENSG00000110066	KMT5B	0	14	0	71	1	1
ENSG00000110074	FOXRED1	0	23	0	213	1	1
ENSG00000110075	PPP6R3	1	21	1	208	0.175362	0.679365
ENSG00000110080	ST3GAL4	0	18	4	242	1	1
ENSG00000110090	CPT1A	1	21	2	271	0.201249	0.729144
ENSG00000110092	CCND1	2	20	0	15	0.319328	0.944521
ENSG00000110104	CCDC86	0	26	1	209	1	1
ENSG00000110107	PRPF19	1	22	0	194	0.101852	0.544892
ENSG00000110108	TMEM109	0	20	1	198	1	1
ENSG00000110171	TRIM3	0	20	0	125	1	1
ENSG00000110172	CHORDC1	0	16	0	168	1	1
ENSG00000110218	PANX1	0	24	2	44	1	1
ENSG00000110274	CEP164	1	27	1	270	0.173833	0.676359
ENSG00000110315	RNF141	2	16	0	284	0.00267558	0.11487
ENSG00000110321	EIF4G2	1	23	2	101	0.462634	1
ENSG00000110429	FBXO3	2	22	0	181	0.0112666	0.213918
ENSG00000110435	PDHX	1	30	1	106	0.393791	1
ENSG00000110455	ACCS	0	10	32	203	1	1
ENSG00000110514	MADD	0	31	0	245	1	1
ENSG00000110583	NAA40	1	24	0	198	0.108108	0.551326
ENSG00000110619	CARS	0	19	3	274	1	1
ENSG00000110628	SLC22A18	0	15	40	332	1	1
ENSG00000110696	C11orf58	0	17	0	230	1	1
ENSG00000110697	PITPNM1	0	11	1	176	1	1
ENSG00000110713	NUP98	2	24	0	283	0.00587597	0.16718
ENSG00000110717	NDUFS8	0	20	1	171	1	1
ENSG00000110756	HPS5	0	25	2	171	1	1
ENSG00000110801	PSMD9	0	19	0	229	1	1
ENSG00000110811	P3H3	0	31	0	13	1	1
ENSG00000110844	PRPF40B	1	14	1	29	0.550388	1
ENSG00000110851	PRDM4	1	14	0	224	0.0588235	0.536472
ENSG00000110871	COQ5	0	21	1	169	1	1
ENSG00000110888	CAPRIN2	2	27	1	168	0.0508627	0.507414
ENSG00000110906	KCTD10	0	19	2	268	1	1
ENSG00000110911	SLC11A2	1	19	0	156	0.108571	0.551908
ENSG00000110917	MLEC	0	17	0	159	1	1
ENSG00000110921	MVK	0	25	0	69	1	1
ENSG00000110931	CAMKK2	0	24	1	333	1	1
ENSG00000110958	PTGES3	0	11	77	223	1	1
ENSG00000110987	BCL7A	0	21	0	15	1	1
ENSG00000111011	RSRC2	0	15	0	161	1	1
ENSG00000111012	CYP27B1	1	14	0	19	0.424242	1
ENSG00000111058	ACSS3	0	14	0	57	1	1
ENSG00000111077	TNS2	2	15	2	13	0.755556	1
ENSG00000111142	METAP2	1	12	0	104	0.103448	0.544998
ENSG00000111196	MAGOHB	0	19	0	69	1	1
ENSG00000111206	FOXM1	0	19	1	61	1	1
ENSG00000111215	PRR4	0	22	3	186	1	1
ENSG00000111224	PARP11	0	20	0	58	1	1
ENSG00000111252	SH2B3	1	22	0	199	0.0995475	0.544892
ENSG00000111261	MANSC1	1	20	0	263	0.0706714	0.536472
ENSG00000111266	DUSP16	0	11	2	197	1	1
ENSG00000111276	CDKN1B	1	22	0	319	0.0645161	0.536472
ENSG00000111300	NAA25	0	12	0	16	1	1
ENSG00000111325	OGFOD2	0	21	0	59	1	1
ENSG00000111331	OAS3	0	32	5	207	1	1
ENSG00000111335	OAS2	0	13	2	293	1	1
ENSG00000111358	GTF2H3	0	14	1	30	1	1
ENSG00000111361	EIF2B1	0	11	1	201	1	1
ENSG00000111364	DDX55	0	20	0	152	1	1
ENSG00000111371	SLC38A1	0	13	0	307	1	1
ENSG00000111412	C12orf49	0	11	0	65	1	1
ENSG00000111424	VDR	0	14	1	249	1	1
ENSG00000111445	RFC5	0	13	2	30	1	1
ENSG00000111450	STX2	1	27	8	132	0.821495	1
ENSG00000111530	CAND1	2	20	0	178	0.00974209	0.205945
ENSG00000111540	RAB5B	1	17	1	149	0.194889	0.718714
ENSG00000111554	MDM1	1	29	0	129	0.183544	0.695606
ENSG00000111581	NUP107	1	22	2	74	0.546305	1
ENSG00000111602	TIMELESS	0	21	0	94	1	1
ENSG00000111605	CPSF6	2	21	0	179	0.0105528	0.209528
ENSG00000111615	KRR1	0	17	0	154	1	1
ENSG00000111639	MRPL51	0	13	3	156	1	1
ENSG00000111640	GAPDH	1	28	1	257	0.187151	0.703252
ENSG00000111642	CHD4	0	27	1	209	1	1
ENSG00000111647	UHRF1BP1L	1	18	1	149	0.204531	0.732789
ENSG00000111652	COPS7A	0	20	0	192	1	1
ENSG00000111666	CHPT1	0	21	1	261	1	1
ENSG00000111667	USP5	0	24	0	149	1	1
ENSG00000111670	GNPTAB	1	21	1	185	0.193938	0.716466
ENSG00000111676	ATN1	0	12	0	63	1	1
ENSG00000111678	C12orf57	1	25	0	49	0.337838	0.980485
ENSG00000111696	NT5DC3	1	26	8	150	0.771309	1
ENSG00000111707	SUDS3	1	11	0	258	0.0408922	0.458147
ENSG00000111711	GOLT1B	0	14	3	187	1	1
ENSG00000111737	RAB35	1	17	0	221	0.0714286	0.536472
ENSG00000111786	SRSF9	1	24	0	261	0.0842105	0.536472
ENSG00000111802	TDP2	0	20	2	319	1	1
ENSG00000111817	DSE	1	25	1	230	0.186815	0.702448
ENSG00000111850	SMIM8	0	12	0	18	1	1
ENSG00000111859	NEDD9	0	29	3	357	1	1
ENSG00000111860	CEP85L	0	24	1	123	1	1
ENSG00000111877	MCM9	0	20	1	94	1	1
ENSG00000111906	HDDC2	2	12	0	15	0.188034	0.704271
ENSG00000111911	HINT3	0	21	0	184	1	1
ENSG00000111912	NCOA7	0	12	0	58	1	1
ENSG00000111913	RIPOR2	0	14	98	359	1	1
ENSG00000111961	SASH1	1	31	0	12	0.72093	1
ENSG00000112029	FBXO5	0	19	1	24	1	1
ENSG00000112033	PPARD	1	15	1	182	0.146846	0.623972
ENSG00000112039	FANCE	0	21	0	39	1	1
ENSG00000112062	MAPK14	0	17	0	281	1	1
ENSG00000112078	KCTD20	0	15	0	213	1	1
ENSG00000112096	SOD2	1	23	9	312	0.513916	1
ENSG00000112110	MRPL18	0	19	0	202	1	1
ENSG00000112118	MCM3	1	18	0	185	0.08867	0.536472
ENSG00000112130	RNF8	0	26	1	92	1	1
ENSG00000112139	MDGA1	0	18	19	47	1	1
ENSG00000112146	FBXO9	0	13	0	151	1	1
ENSG00000112149	CD83	0	11	2	175	1	1
ENSG00000112159	MDN1	2	34	0	89	0.0747701	0.536472
ENSG00000112182	BACH2	0	11	1	68	1	1
ENSG00000112200	ZNF451	2	15	1	65	0.0886076	0.536472
ENSG00000112234	FBXL4	0	10	0	96	1	1
ENSG00000112249	ASCC3	4	27	2	105	0.0159755	0.258166
ENSG00000112294	ALDH5A1	0	20	0	36	1	1
ENSG00000112297	AIM1	1	16	0	297	0.0511182	0.507414
ENSG00000112304	ACOT13	0	19	0	197	1	1
ENSG00000112306	RPS12	0	17	1	198	1	1
ENSG00000112308	C6orf62	3	13	1	306	0.000208386	0.0267814
ENSG00000112339	HBS1L	2	22	3	185	0.0886454	0.536472
ENSG00000112343	TRIM38	1	11	1	298	0.0700416	0.536472
ENSG00000112365	ZBTB24	0	21	1	91	1	1
ENSG00000112367	FIG4	1	19	1	230	0.147072	0.623972
ENSG00000112378	PERP	2	14	1	99	0.0400323	0.455263
ENSG00000112406	HECA	1	19	1	230	0.147072	0.623972
ENSG00000112425	EPM2A	0	19	1	11	1	1
ENSG00000112473	SLC39A7	1	18	0	141	0.113208	0.559981
ENSG00000112511	PHF1	0	13	0	187	1	1
ENSG00000112514	CUTA	0	19	0	50	1	1
ENSG00000112531	QKI	1	10	1	210	0.0890411	0.536472
ENSG00000112561	TFEB	0	24	1	316	1	1
ENSG00000112576	CCND3	0	30	4	344	1	1
ENSG00000112584	FAM120B	0	12	1	267	1	1
ENSG00000112592	TBP	0	17	0	117	1	1
ENSG00000112659	CUL9	0	17	0	183	1	1
ENSG00000112679	DUSP22	27	37	48	185	1e-07	9.63e-05
ENSG00000112697	TMEM30A	0	10	0	152	1	1
ENSG00000112699	GMDS	0	17	3	158	1	1
ENSG00000112701	SENP6	1	17	0	216	0.0729614	0.536472
ENSG00000112715	VEGFA	0	34	1	290	1	1
ENSG00000112739	PRPF4B	0	20	0	162	1	1
ENSG00000112763	BTN2A1	0	13	3	238	1	1
ENSG00000112851	ERBIN	1	17	0	139	0.108974	0.552498
ENSG00000112877	CEP72	0	14	2	16	1	1
ENSG00000112893	MAN2A1	1	26	1	208	0.2103	0.742244
ENSG00000112941	PAPD7	0	12	0	169	1	1
ENSG00000112972	HMGCS1	2	27	2	130	0.137152	0.610222
ENSG00000112977	DAP	0	11	0	275	1	1
ENSG00000112983	BRD8	0	18	0	163	1	1
ENSG00000112992	NNT	2	24	0	116	0.0283659	0.374286
ENSG00000112996	MRPS30	0	20	0	82	1	1
ENSG00000113013	HSPA9	2	22	0	256	0.00599953	0.16718
ENSG00000113048	MRPS27	0	18	0	232	1	1
ENSG00000113070	HBEGF	2	10	0	148	0.00362815	0.138559
ENSG00000113108	APBB3	0	14	1	258	1	1
ENSG00000113119	TMCO6	0	12	0	171	1	1
ENSG00000113140	SPARC	0	23	0	255	1	1
ENSG00000113141	IK	0	10	0	176	1	1
ENSG00000113163	COL4A3BP	0	12	1	188	1	1
ENSG00000113240	CLK4	0	10	0	46	1	1
ENSG00000113269	RNF130	2	18	3	317	0.0248083	0.34144
ENSG00000113272	THG1L	0	20	0	121	1	1
ENSG00000113273	ARSB	0	33	0	233	1	1
ENSG00000113318	MSH3	0	23	2	95	1	1
ENSG00000113360	DROSHA	1	22	0	126	0.148649	0.626962
ENSG00000113368	LMNB1	2	19	1	275	0.0114483	0.216651
ENSG00000113407	TARS	0	24	0	193	1	1
ENSG00000113441	LNPEP	0	14	1	234	1	1
ENSG00000113456	RAD1	1	10	0	19	0.344828	0.992889
ENSG00000113504	SLC12A7	1	25	69	277	0.999004	1
ENSG00000113552	GNPDA1	1	15	0	262	0.0541516	0.525298
ENSG00000113569	NUP155	0	15	0	53	1	1
ENSG00000113575	PPP2CA	1	13	0	135	0.0878378	0.536472
ENSG00000113580	NR3C1	1	11	0	255	0.0413534	0.460166
ENSG00000113593	PPWD1	0	14	0	180	1	1
ENSG00000113597	TRAPPC13	0	12	0	42	1	1
ENSG00000113621	TXNDC15	0	12	1	131	1	1
ENSG00000113638	TTC33	0	12	3	32	1	1
ENSG00000113643	RARS	1	27	1	222	0.205499	0.733441
ENSG00000113648	H2AFY	1	20	0	217	0.0843882	0.536472
ENSG00000113649	TCERG1	0	12	0	143	1	1
ENSG00000113716	HMGXB3	1	23	0	255	0.0827338	0.536472
ENSG00000113719	ERGIC1	1	12	12	322	0.384053	1
ENSG00000113721	PDGFRB	0	17	0	80	1	1
ENSG00000113742	CPEB4	1	25	1	233	0.184749	0.698334
ENSG00000113758	DBN1	2	22	0	207	0.00884854	0.19885
ENSG00000113810	SMC4	0	11	0	137	1	1
ENSG00000113811	RP11-884K10.5	0	11	4	180	1	1
ENSG00000113812	ACTR8	0	25	1	160	1	1
ENSG00000113845	TIMMDC1	0	18	0	201	1	1
ENSG00000113916	BCL6	0	15	0	346	1	1
ENSG00000113971	NPHP3	0	14	2	48	1	1
ENSG00000114021	NIT2	1	10	1	80	0.210986	0.743378
ENSG00000114026	OGG1	0	27	0	151	1	1
ENSG00000114062	UBE3A	3	14	1	18	0.210039	0.741777
ENSG00000114126	TFDP2	1	11	0	96	0.102804	0.544892
ENSG00000114127	XRN1	2	16	0	187	0.0058528	0.16718
ENSG00000114166	KAT2B	2	22	3	266	0.0484612	0.502229
ENSG00000114331	ACAP2	2	12	0	214	0.00259587	0.113385
ENSG00000114354	TFG	2	17	0	272	0.00326797	0.131123
ENSG00000114383	TUSC2	0	14	0	25	1	1
ENSG00000114391	RPL24	1	15	1	93	0.259605	0.833432
ENSG00000114423	CBLB	2	22	3	222	0.0657865	0.536472
ENSG00000114450	GNB4	0	26	0	58	1	1
ENSG00000114480	GBE1	0	19	1	255	1	1
ENSG00000114491	UMPS	0	18	2	68	1	1
ENSG00000114503	NCBP2	0	13	0	260	1	1
ENSG00000114541	FRMD4B	0	12	3	90	1	1
ENSG00000114544	SLC41A3	2	30	0	259	0.0104527	0.209528
ENSG00000114554	PLXNA1	0	30	0	40	1	1
ENSG00000114631	PODXL2	1	14	0	17	0.451613	1
ENSG00000114648	KLHL18	1	16	1	102	0.253803	0.821317
ENSG00000114650	SCAP	1	20	0	218	0.0840336	0.536472
ENSG00000114742	WDR48	0	13	8	214	1	1
ENSG00000114744	COMMD2	1	25	0	190	0.116279	0.567967
ENSG00000114770	ABCC5	0	26	1	226	1	1
ENSG00000114796	KLHL24	0	19	3	174	1	1
ENSG00000114853	ZBTB47	2	17	1	105	0.0506706	0.507414
ENSG00000114867	EIF4G1	1	25	1	263	0.166352	0.662759
ENSG00000114902	SPCS1	0	13	1	190	1	1
ENSG00000114904	NEK4	1	20	0	59	0.253165	0.821001
ENSG00000114933	INO80D	1	24	0	26	0.48	1
ENSG00000114942	EEF1B2	0	11	0	27	1	1
ENSG00000114956	DGUOK	1	24	1	220	0.187411	0.703458
ENSG00000114978	MOB1A	1	11	0	187	0.0555556	0.529157
ENSG00000114999	TTL	0	22	2	104	1	1
ENSG00000115020	PIKFYVE	3	21	0	101	0.00450481	0.147354
ENSG00000115053	NCL	1	24	1	168	0.234948	0.785389
ENSG00000115073	ACTR1B	2	25	0	255	0.00768049	0.183344
ENSG00000115084	SLC35F5	0	20	1	112	1	1
ENSG00000115107	STEAP3	1	21	3	171	0.373255	1
ENSG00000115109	EPB41L5	0	14	2	15	1	1
ENSG00000115159	GPD2	2	21	0	154	0.0137931	0.234283
ENSG00000115170	ACVR1	1	18	0	77	0.189474	0.70736
ENSG00000115207	GTF3C2	2	23	0	179	0.0124624	0.223036
ENSG00000115211	EIF2B4	0	18	0	83	1	1
ENSG00000115232	ITGA4	3	15	2	246	0.00144677	0.0804817
ENSG00000115234	SNX17	0	25	1	195	1	1
ENSG00000115239	ASB3	1	17	1	20	0.714715	1
ENSG00000115241	PPM1G	3	21	0	178	0.00102806	0.067397
ENSG00000115267	IFIH1	1	15	2	161	0.235737	0.786275
ENSG00000115286	NDUFS7	0	17	0	211	1	1
ENSG00000115295	CLIP4	1	24	1	149	0.258906	0.832114
ENSG00000115306	SPTBN1	2	33	1	186	0.060037	0.536472
ENSG00000115307	AUP1	0	21	0	190	1	1
ENSG00000115310	RTN4	0	13	0	234	1	1
ENSG00000115317	HTRA2	0	14	0	45	1	1
ENSG00000115355	CCDC88A	2	10	1	128	0.0137211	0.234236
ENSG00000115364	MRPL19	0	22	2	107	1	1
ENSG00000115368	WDR75	0	19	0	44	1	1
ENSG00000115392	FANCL	0	14	0	61	1	1
ENSG00000115414	FN1	1	33	21	137	0.993964	1
ENSG00000115425	PECR	0	19	1	183	1	1
ENSG00000115446	UNC50	0	16	0	123	1	1
ENSG00000115459	ELMOD3	0	14	0	178	1	1
ENSG00000115461	IGFBP5	0	11	3	17	1	1
ENSG00000115464	USP34	3	29	1	223	0.00511151	0.158457
ENSG00000115486	GGCX	1	28	0	138	0.168675	0.666932
ENSG00000115504	EHBP1	1	13	0	10	0.565217	1
ENSG00000115520	COQ10B	1	10	0	94	0.0961538	0.539155
ENSG00000115524	SF3B1	1	22	0	201	0.0986547	0.544684
ENSG00000115525	ST3GAL5	0	10	2	34	1	1
ENSG00000115526	CHST10	1	25	0	20	0.555556	1
ENSG00000115539	PDCL3	0	19	4	156	1	1
ENSG00000115548	KDM3A	0	25	1	232	1	1
ENSG00000115556	PLCD4	0	22	3	57	1	1
ENSG00000115561	CHMP3	1	18	0	222	0.075	0.536472
ENSG00000115568	ZNF142	3	29	0	154	0.00363679	0.138559
ENSG00000115641	FHL2	1	15	0	58	0.205479	0.733441
ENSG00000115649	CNPPD1	2	25	0	232	0.00911965	0.200802
ENSG00000115657	ABCB6	2	11	0	46	0.0344612	0.421819
ENSG00000115661	STK16	0	19	2	166	1	1
ENSG00000115677	HDLBP	3	33	0	259	0.00132847	0.0779866
ENSG00000115685	PPP1R7	0	18	0	169	1	1
ENSG00000115687	PASK	1	29	20	135	0.987597	1
ENSG00000115694	STK25	0	19	0	261	1	1
ENSG00000115750	TAF1B	0	24	1	52	1	1
ENSG00000115756	HPCAL1	1	12	3	342	0.129375	0.596769
ENSG00000115758	ODC1	1	12	0	124	0.0882353	0.536472
ENSG00000115760	BIRC6	3	35	3	221	0.0351697	0.425868
ENSG00000115761	NOL10	1	21	1	181	0.197576	0.722504
ENSG00000115808	STRN	0	11	0	138	1	1
ENSG00000115816	CEBPZ	1	31	1	170	0.285323	0.885364
ENSG00000115825	PRKD3	1	28	1	198	0.23292	0.782325
ENSG00000115827	DCAF17	0	16	0	58	1	1
ENSG00000115839	RAB3GAP1	0	22	1	187	1	1
ENSG00000115840	SLC25A12	0	14	2	85	1	1
ENSG00000115902	SLC1A4	1	28	17	114	0.985668	1
ENSG00000115935	WIPF1	1	22	2	303	0.190186	0.70743
ENSG00000115942	ORC2	0	12	0	76	1	1
ENSG00000115946	PNO1	0	22	1	144	1	1
ENSG00000115947	ORC4	0	14	0	117	1	1
ENSG00000115970	THADA	2	34	1	244	0.0403323	0.455858
ENSG00000115977	AAK1	0	25	3	103	1	1
ENSG00000115993	TRAK2	1	23	0	242	0.0867925	0.536472
ENSG00000116005	PCYOX1	0	13	2	48	1	1
ENSG00000116062	MSH6	4	26	0	79	0.00312746	0.131123
ENSG00000116095	PLEKHA3	1	12	2	120	0.250414	0.814836
ENSG00000116106	EPHA4	1	13	1	29	0.528455	1
ENSG00000116120	FARSB	0	19	0	100	1	1
ENSG00000116127	ALMS1	0	30	1	46	1	1
ENSG00000116128	BCL9	0	26	1	66	1	1
ENSG00000116133	DHCR24	1	17	0	152	0.100592	0.544892
ENSG00000116138	DNAJC16	1	19	0	102	0.157025	0.642963
ENSG00000116157	GPX7	0	12	1	134	1	1
ENSG00000116161	CACYBP	0	21	0	214	1	1
ENSG00000116191	RALGPS2	1	10	1	176	0.104911	0.547379
ENSG00000116198	CEP104	1	25	4	156	0.528681	1
ENSG00000116199	FAM20B	1	28	0	199	0.123348	0.585013
ENSG00000116213	WRAP73	0	16	0	212	1	1
ENSG00000116221	MRPL37	0	15	0	167	1	1
ENSG00000116251	RPL22	2	16	0	61	0.0410116	0.458147
ENSG00000116260	QSOX1	0	23	14	283	1	1
ENSG00000116266	STXBP3	2	30	1	255	0.0301192	0.387641
ENSG00000116273	PHF13	0	11	0	185	1	1
ENSG00000116337	AMPD2	1	24	0	285	0.0776699	0.536472
ENSG00000116350	SRSF4	0	24	0	244	1	1
ENSG00000116406	EDEM3	3	31	2	149	0.0365518	0.43268
ENSG00000116455	WDR77	0	17	1	83	1	1
ENSG00000116459	ATP5F1	0	20	2	123	1	1
ENSG00000116514	RNF19B	0	17	0	173	1	1
ENSG00000116521	SCAMP3	0	17	0	174	1	1
ENSG00000116525	TRIM62	0	10	1	117	1	1
ENSG00000116580	GON4L	0	21	1	154	1	1
ENSG00000116584	ARHGEF2	1	11	1	147	0.134806	0.607428
ENSG00000116586	LAMTOR2	0	10	0	97	1	1
ENSG00000116604	MEF2D	0	22	0	242	1	1
ENSG00000116668	SWT1	0	17	1	67	1	1
ENSG00000116670	MAD2L2	0	12	0	59	1	1
ENSG00000116675	DNAJC6	1	17	0	10	0.62963	1
ENSG00000116678	LEPR	1	22	1	106	0.31533	0.938485
ENSG00000116679	IVNS1ABP	1	22	1	258	0.151229	0.633566
ENSG00000116685	KIAA2013	0	18	0	256	1	1
ENSG00000116688	MFN2	0	20	14	277	1	1
ENSG00000116691	MIIP	0	23	0	263	1	1
ENSG00000116698	SMG7	1	18	3	274	0.225753	0.76859
ENSG00000116729	WLS	0	31	25	275	1	1
ENSG00000116731	PRDM2	1	16	2	269	0.159672	0.646442
ENSG00000116747	TROVE2	1	20	0	168	0.106383	0.548406
ENSG00000116750	UCHL5	0	10	0	13	1	1
ENSG00000116752	BCAS2	0	11	0	190	1	1
ENSG00000116771	AGMAT	2	10	0	22	0.0907258	0.536472
ENSG00000116786	PLEKHM2	1	23	0	220	0.0946502	0.536472
ENSG00000116791	CRYZ	0	29	3	72	1	1
ENSG00000116793	PHTF1	2	20	0	185	0.00908656	0.200802
ENSG00000116809	ZBTB17	1	20	0	255	0.0727273	0.536472
ENSG00000116830	TTF2	0	24	1	29	1	1
ENSG00000116857	TMEM9	1	25	3	288	0.28441	0.883315
ENSG00000116871	MAP7D1	1	15	0	215	0.0652174	0.536472
ENSG00000116874	WARS2	1	19	0	26	0.422222	1
ENSG00000116906	GNPAT	2	30	1	221	0.0384755	0.443586
ENSG00000116922	C1orf109	1	27	0	49	0.355263	1
ENSG00000116962	NID1	2	31	1	38	0.423045	1
ENSG00000116977	LGALS8	0	23	11	263	1	1
ENSG00000116984	MTR	0	32	2	105	1	1
ENSG00000116991	SIPA1L2	1	38	1	309	0.20731	0.736227
ENSG00000117000	RLF	0	16	0	167	1	1
ENSG00000117054	ACADM	0	17	2	122	1	1
ENSG00000117115	PADI2	1	12	101	284	0.994435	1
ENSG00000117133	RPF1	0	19	0	135	1	1
ENSG00000117139	KDM5B	3	19	0	190	0.000646093	0.0513221
ENSG00000117151	CTBS	4	17	2	207	0.000317309	0.0314737
ENSG00000117153	KLHL12	0	21	0	164	1	1
ENSG00000117155	SSX2IP	1	21	0	31	0.403846	1
ENSG00000117222	RBBP5	2	20	0	210	0.00721473	0.180462
ENSG00000117226	GBP3	7	19	17	157	0.00613305	0.167492
ENSG00000117242	RP11-401M16.7	0	25	2	137	1	1
ENSG00000117280	RAB29	1	33	0	268	0.109635	0.553756
ENSG00000117298	ECE1	1	24	0	319	0.0699708	0.536472
ENSG00000117318	ID3	0	19	0	197	1	1
ENSG00000117362	APH1A	0	17	0	126	1	1
ENSG00000117385	P3H1	0	16	1	194	1	1
ENSG00000117394	SLC2A1	0	16	0	249	1	1
ENSG00000117395	EBNA1BP2	1	17	0	154	0.0994152	0.544892
ENSG00000117399	CDC20	0	11	1	52	1	1
ENSG00000117408	IPO13	1	19	1	101	0.292717	0.898134
ENSG00000117410	ATP6V0B	1	10	0	190	0.05	0.504649
ENSG00000117411	B4GALT2	0	10	0	27	1	1
ENSG00000117448	AKR1A1	0	15	2	209	1	1
ENSG00000117481	NSUN4	0	28	4	210	1	1
ENSG00000117500	TMED5	3	11	0	215	8.69e-05	0.0147066
ENSG00000117505	DR1	1	15	0	226	0.0622407	0.536472
ENSG00000117519	CNN3	0	12	0	11	1	1
ENSG00000117523	PRRC2C	1	34	0	274	0.11039	0.556329
ENSG00000117528	ABCD3	0	19	0	58	1	1
ENSG00000117569	PTBP2	0	12	0	158	1	1
ENSG00000117592	PRDX6	0	17	0	159	1	1
ENSG00000117597	DIEXF	1	26	0	39	0.4	1
ENSG00000117602	RCAN3	1	16	0	173	0.0846561	0.536472
ENSG00000117616	RSRP1	0	19	7	280	1	1
ENSG00000117625	RCOR3	1	10	2	129	0.202026	0.7296
ENSG00000117640	MTFR1L	0	14	2	200	1	1
ENSG00000117650	NEK2	0	24	0	14	1	1
ENSG00000117676	RPS6KA1	1	27	0	342	0.0731707	0.536472
ENSG00000117682	DHDDS	0	14	0	212	1	1
ENSG00000117691	NENF	0	16	0	175	1	1
ENSG00000117697	NSL1	0	26	0	181	1	1
ENSG00000117724	CENPF	2	36	4	45	0.839378	1
ENSG00000117748	RPA2	0	13	10	270	1	1
ENSG00000117859	OSBPL9	0	13	0	152	1	1
ENSG00000117868	ESYT2	2	16	4	238	0.0481926	0.502229
ENSG00000117877	CD3EAP	1	16	0	141	0.101911	0.544892
ENSG00000117899	MESDC2	0	15	0	129	1	1
ENSG00000117984	CTSD	0	15	3	309	1	1
ENSG00000118007	STAG1	2	24	2	226	0.0471124	0.501418
ENSG00000118096	IFT46	0	11	0	30	1	1
ENSG00000118162	KPTN	0	14	0	153	1	1
ENSG00000118181	RPS25	1	17	3	187	0.295841	0.904533
ENSG00000118197	DDX59	1	10	0	108	0.0847458	0.536472
ENSG00000118217	ATF6	1	27	0	293	0.084375	0.536472
ENSG00000118242	MREG	3	25	3	51	0.306071	0.921571
ENSG00000118369	USP35	0	14	3	155	1	1
ENSG00000118412	CASP8AP2	0	19	0	16	1	1
ENSG00000118496	FBXO30	0	21	2	94	1	1
ENSG00000118564	FBXL5	1	16	6	294	0.312496	0.932959
ENSG00000118579	MED28	0	17	2	205	1	1
ENSG00000118655	DCLRE1B	1	10	0	55	0.153846	0.638857
ENSG00000118705	RPN2	2	21	0	153	0.0139526	0.236086
ENSG00000118785	SPP1	1	14	16	83	0.946072	1
ENSG00000118855	MFSD1	0	24	2	274	1	1
ENSG00000118873	RAB3GAP2	0	10	0	61	1	1
ENSG00000118894	EEF2KMT	0	22	1	109	1	1
ENSG00000118898	PPL	0	17	2	39	1	1
ENSG00000118900	UBN1	0	22	0	281	1	1
ENSG00000118922	KLF12	1	12	0	66	0.153846	0.638857
ENSG00000118960	HS1BP3	1	35	0	334	0.0948509	0.536472
ENSG00000118961	LDAH	0	34	0	52	1	1
ENSG00000118965	WDR35	2	28	0	16	0.399577	1
ENSG00000118971	CCND2	1	22	0	285	0.0716612	0.536472
ENSG00000118985	ELL2	0	13	1	151	1	1
ENSG00000119004	CYP20A1	0	21	0	70	1	1
ENSG00000119139	TJP2	1	23	4	128	0.567603	1
ENSG00000119185	ITGB1BP1	0	14	3	83	1	1
ENSG00000119231	SENP5	1	17	0	193	0.0809524	0.536472
ENSG00000119242	CCDC92	0	23	0	207	1	1
ENSG00000119280	C1orf198	0	11	0	47	1	1
ENSG00000119285	HEATR1	4	27	1	187	0.000942373	0.0653189
ENSG00000119314	PTBP3	1	24	0	268	0.0821918	0.536472
ENSG00000119318	RAD23B	2	18	0	223	0.00529046	0.159645
ENSG00000119321	FKBP15	2	31	0	321	0.0075272	0.183344
ENSG00000119326	CTNNAL1	0	14	0	58	1	1
ENSG00000119333	WDR34	0	10	1	90	1	1
ENSG00000119383	PPP2R4	0	16	0	203	1	1
ENSG00000119392	GLE1	0	16	1	193	1	1
ENSG00000119397	CNTRL	1	24	2	185	0.307754	0.92503
ENSG00000119403	PHF19	1	24	0	231	0.0941176	0.536472
ENSG00000119421	NDUFA8	0	26	0	194	1	1
ENSG00000119431	HDHD3	1	21	3	181	0.357618	1
ENSG00000119487	MAPKAP1	0	12	0	252	1	1
ENSG00000119509	INVS	0	20	0	35	1	1
ENSG00000119522	DENND1A	0	25	1	254	1	1
ENSG00000119537	KDSR	0	15	0	161	1	1
ENSG00000119596	YLPM1	1	25	3	152	0.459215	1
ENSG00000119599	DCAF4	0	18	2	75	1	1
ENSG00000119638	NEK9	4	16	0	211	1.69e-05	0.00388752
ENSG00000119669	IRF2BPL	6	20	1	216	1.14e-06	0.00073037
ENSG00000119682	AREL1	0	15	0	220	1	1
ENSG00000119684	MLH3	1	14	0	123	0.10219	0.544892
ENSG00000119685	TTLL5	0	20	0	64	1	1
ENSG00000119688	ABCD4	0	18	0	243	1	1
ENSG00000119689	DLST	1	23	0	291	0.0732484	0.536472
ENSG00000119705	C14orf156	0	10	1	36	1	1
ENSG00000119707	RBM25	1	11	1	100	0.189189	0.706757
ENSG00000119711	ALDH6A1	1	11	0	27	0.289474	0.893424
ENSG00000119720	NRDE2	1	24	1	189	0.213128	0.745364
ENSG00000119723	COQ6	0	16	0	159	1	1
ENSG00000119725	ZNF410	0	11	0	170	1	1
ENSG00000119772	DNMT3A	0	15	0	92	1	1
ENSG00000119777	TMEM214	1	23	0	192	0.106977	0.548881
ENSG00000119778	ATAD2B	0	15	3	50	1	1
ENSG00000119787	ATL2	1	25	0	156	0.138122	0.610771
ENSG00000119801	YPEL5	0	24	1	261	1	1
ENSG00000119865	CNRIP1	0	23	2	12	1	1
ENSG00000119899	SLC17A5	0	10	1	156	1	1
ENSG00000119900	OGFRL1	0	10	4	239	1	1
ENSG00000119906	SLF2	1	13	3	114	0.354319	1
ENSG00000119977	TCTN3	1	10	1	154	0.118584	0.57281
ENSG00000120071	KANSL1	2	32	3	275	0.0862735	0.536472
ENSG00000120129	DUSP1	1	12	0	150	0.0740741	0.536472
ENSG00000120158	RCL1	0	13	0	129	1	1
ENSG00000120162	MOB3B	0	16	3	64	1	1
ENSG00000120254	MTHFD1L	0	18	2	48	1	1
ENSG00000120265	PCMT1	0	14	0	171	1	1
ENSG00000120278	PLEKHG1	1	29	1	26	0.781145	1
ENSG00000120306	CYSTM1	0	10	0	241	1	1
ENSG00000120314	WDR55	0	23	0	264	1	1
ENSG00000120318	ARAP3	0	26	2	311	1	1
ENSG00000120370	GORAB	1	25	0	20	0.555556	1
ENSG00000120437	ACAT2	2	28	0	228	0.0115809	0.216812
ENSG00000120438	TCP1	1	22	0	146	0.130952	0.599816
ENSG00000120451	SNX19	1	32	12	288	0.752795	1
ENSG00000120526	NUDCD1	0	22	2	38	1	1
ENSG00000120647	CCDC77	0	18	0	45	1	1
ENSG00000120662	MTRF1	1	14	3	61	0.570649	1
ENSG00000120675	DNAJC15	3	10	1	213	0.000256953	0.027375
ENSG00000120685	PROSER1	1	15	0	202	0.0691244	0.536472
ENSG00000120690	ELF1	0	14	0	226	1	1
ENSG00000120694	HSPH1	0	16	0	184	1	1
ENSG00000120699	EXOSC8	0	14	0	176	1	1
ENSG00000120708	TGFBI	3	16	9	260	0.0256108	0.349145
ENSG00000120709	FAM53C	0	15	0	294	1	1
ENSG00000120725	SIL1	0	20	0	204	1	1
ENSG00000120733	KDM3B	1	28	0	294	0.0869565	0.536472
ENSG00000120742	SERP1	1	13	2	255	0.139072	0.612205
ENSG00000120800	UTP20	1	31	0	20	0.607843	1
ENSG00000120802	TMPO	2	12	3	219	0.0227385	0.32541
ENSG00000120805	ARL1	0	13	0	56	1	1
ENSG00000120860	WASHC3	0	10	1	195	1	1
ENSG00000120875	DUSP4	0	25	0	53	1	1
ENSG00000120885	CLU	0	23	0	187	1	1
ENSG00000120889	TNFRSF10B	1	30	0	267	0.10101	0.544892
ENSG00000120896	SORBS3	1	28	1	235	0.201956	0.7296
ENSG00000120899	PTK2B	2	20	0	336	0.0030068	0.127192
ENSG00000120910	PPP3CC	1	13	1	189	0.124871	0.588133
ENSG00000120913	PDLIM2	0	14	0	299	1	1
ENSG00000120915	EPHX2	1	13	0	104	0.111111	0.556329
ENSG00000121022	COPS5	1	10	0	48	0.172414	0.67476
ENSG00000121057	AKAP1	0	32	0	142	1	1
ENSG00000121060	TRIM25	0	13	1	344	1	1
ENSG00000121073	SLC35B1	0	10	0	93	1	1
ENSG00000121152	NCAPH	2	22	0	18	0.296154	0.904533
ENSG00000121210	KIAA0922	0	25	2	308	1	1
ENSG00000121289	CEP89	1	28	0	93	0.231405	0.780347
ENSG00000121297	TSHZ3	0	13	0	88	1	1
ENSG00000121316	PLBD1	5	11	9	336	1.99e-05	0.00439622
ENSG00000121350	PYROXD1	1	12	0	188	0.06	0.536472
ENSG00000121413	ZSCAN18	1	20	1	175	0.195083	0.718766
ENSG00000121578	B4GALT4	1	33	0	240	0.120879	0.578531
ENSG00000121579	NAA50	0	17	0	217	1	1
ENSG00000121691	CAT	0	14	12	226	1	1
ENSG00000121716	PILRB	0	14	11	244	1	1
ENSG00000121753	ADGRB2	1	24	0	14	0.631579	1
ENSG00000121766	ZCCHC17	0	18	0	224	1	1
ENSG00000121775	TMEM39B	0	12	0	56	1	1
ENSG00000121864	ZNF639	1	13	1	56	0.343564	0.990241
ENSG00000121892	PDS5A	1	14	4	97	0.497162	1
ENSG00000121897	LIAS	0	24	0	135	1	1
ENSG00000121931	LRIF1	6	25	0	64	0.000304763	0.0307597
ENSG00000121940	CLCC1	0	25	0	63	1	1
ENSG00000121957	GPSM2	0	15	2	147	1	1
ENSG00000121964	GTDC1	1	19	0	187	0.092233	0.536472
ENSG00000122008	POLK	0	10	0	82	1	1
ENSG00000122033	MTIF3	0	11	1	194	1	1
ENSG00000122034	GTF3A	0	16	2	225	1	1
ENSG00000122068	FYTTD1	0	11	1	99	1	1
ENSG00000122085	MTERF4	1	22	1	213	0.178833	0.684497
ENSG00000122218	COPA	2	26	0	222	0.0106112	0.209528
ENSG00000122257	RBBP6	1	24	3	227	0.332732	0.973657
ENSG00000122299	ZC3H7A	0	26	0	221	1	1
ENSG00000122335	SERAC1	0	12	1	75	1	1
ENSG00000122386	ZNF205	0	23	0	10	1	1
ENSG00000122390	NAA60	1	22	6	265	0.431321	1
ENSG00000122417	ODF2L	1	18	3	122	0.427031	1
ENSG00000122432	SPATA1	2	14	3	91	0.13089	0.599816
ENSG00000122483	CCDC18	0	21	4	104	1	1
ENSG00000122507	BBS9	1	18	0	46	0.28125	0.878634
ENSG00000122512	PMS2	1	23	2	58	0.63835	1
ENSG00000122515	ZMIZ2	3	30	0	293	0.000729649	0.0552325
ENSG00000122547	EEPD1	0	23	2	301	1	1
ENSG00000122550	KLHL7	0	17	0	129	1	1
ENSG00000122557	HERPUD2	0	23	0	242	1	1
ENSG00000122591	FAM126A	1	26	5	80	0.823847	1
ENSG00000122642	FKBP9	0	11	2	203	1	1
ENSG00000122643	NT5C3A	0	16	2	177	1	1
ENSG00000122678	POLM	0	18	0	225	1	1
ENSG00000122694	GLIPR2	1	17	2	306	0.150171	0.631994
ENSG00000122705	CLTA	0	12	0	127	1	1
ENSG00000122729	ACO1	0	14	1	89	1	1
ENSG00000122741	DCAF10	0	12	0	124	1	1
[truncated: 3,754 more rows]
